# 1 **Occupancy patterns of 208 DNA-associated proteins in a** 2 **single human cell type**

3

4 E. Christopher Partridge<sup>1\*</sup>, Surya B. Chhetri<sup>1,2\*</sup>, Jeremy W. Prokop<sup>1,3</sup>, Ryne C.  
5 Ramaker<sup>1,4</sup>, Camden S. Jansen<sup>5</sup>, Say-Tar Goh<sup>6</sup>, Mark Mackiewicz<sup>1</sup>, Kimberly M.  
6 Newberry<sup>1</sup>, Laurel A. Brandsmeier<sup>1</sup>, Sarah K. Meadows<sup>1</sup>, C. Luke Messer<sup>1</sup>, Andrew A.  
7 Hardigan<sup>1,4</sup>, Emma C. Dean<sup>1,7</sup>, Shan Jiang<sup>5</sup>, Daniel Savic<sup>8</sup>, Ali Mortazavi<sup>5</sup>, Barbara J.  
8 Wold<sup>6</sup>, Richard M. Myers<sup>1</sup>, Eric M. Mendenhall<sup>1,2</sup>

9

10 <sup>1</sup>HudsonAlpha Institute for Biotechnology, Huntsville, Alabama 35806, USA

11 <sup>2</sup>Department of Biological Sciences, The University of Alabama in Huntsville, Huntsville,  
12 Alabama 35899, USA

13 <sup>3</sup>Department of Pediatrics and Human Development, College of Human Medicine,  
14 Michigan State University, Grand Rapids, Michigan 49503, USA

15 <sup>4</sup>Department of Genetics, University of Alabama at Birmingham, Birmingham, Alabama  
16 35294, USA

17 <sup>5</sup>Department of Developmental and Cell Biology, University of California Irvine, Irvine,  
18 California 92697, USA

19 <sup>6</sup>Division of Biology, California Institute of Technology, Pasadena, California 91125,  
20 USA

21 <sup>7</sup>Department of Pathology, University of Alabama at Birmingham, Birmingham, Alabama  
22 35294, USA

23 <sup>8</sup>Pharmaceutical Sciences Department, St. Jude Children's Research Hospital,  
24 Memphis, Tennessee 38105, USA

25 \*co-first authors

26

27 Correspondence to Eric M. Mendenhall ([eric.mendenhall@uah.edu](mailto:eric.mendenhall@uah.edu)) or Richard M.  
28 Myers ([rmyers@hudsonalpha.org](mailto:rmyers@hudsonalpha.org))

29

## 30 **Summary**

31 Genome-wide occupancy maps of transcriptional regulators are important for  
32 understanding gene regulation and its effects on diverse biological processes, but only  
33 a small fraction of the >1,600 transcription factors (TFs) encoded in the human genome  
34 has been assayed. Here we present data and analyses of ChIP-seq experiments for  
35 208 DNA-associated proteins (DAPs) in the HepG2 hepatocellular carcinoma line,  
36 spanning nearly a quarter of its expressed TFs, transcriptional co-factors, and chromatin  
37 regulator proteins. The DAP binding profiles classify into major groups associated  
38 predominantly with promoters or enhancers, or with both. We confirm and expand the  
39 current catalog of DNA sequence motifs; 77 factors showed similar motifs to those  
40 previously described using *in vivo* and/or *in vitro* methods, and 17 yielded novel motifs.  
41 We also describe motifs corresponding to other TFs that co-enrich with the primary  
42 ChIP target. FOX family motifs are, for example, significantly enriched in ChIP-seq  
43 peaks of 37 other DAPs. We show that promoters and enhancers can be discriminated  
44 based on motif content and occupancy patterns. This large catalog reveals High  
45 Occupancy Target (HOT) regions at which many DAPs associate, although each  
46 contains motifs for only a minority of the numerous associated DAPs. These analyses  
47 provide a deeper and more complete overview of the gene regulatory networks that  
48 define this cell type.

49

## 50 **Introduction**

51 Transcription factors (TFs) are DNA-binding proteins that play key roles in gene  
52 regulation [1,2]. According to the most recent census and review of putative TFs,  
53 including manual curation of DNA-binding domains in protein sequences and  
54 experimental observations of DNA binding, there are 1,639 known or likely TFs in the  
55 human genome [2]. However, other tallies [1,3], and broader definitions of proteins that  
56 associate with DNA, including transcriptional cofactors (CFs) and chromatin regulators  
57 or chromatin modifying enzymes (CRs), suggest there may be as many as 2,500 such  
58 proteins encoded in the human reference assembly; we refer to these collectively as  
59 DNA-associated proteins (DAPs), in order to distinguish this broad group of proteins  
60 from the stricter definition of direct DNA-binding TFs. A typical TF binds preferentially to  
61 a short DNA sequence motif, and, *in vivo*, some TFs also exhibit additional  
62 chromosomal occupancy mediated by their interactions with other DAPs [4-6], although  
63 the extent and biological significance of most secondary associations are not well  
64 understood [7]. TFs, CFs, and CRs all play vital roles in orchestrating cell type- and cell  
65 state-specific gene regulation, including the temporal coordination of gene expression in  
66 developmental processes, environmental responses, and disease states [8-14].

67 Identifying genomic regions with which a TF is physically associated, commonly referred  
68 to as TF binding sites (TFBSs), is an important step toward understanding its biological  
69 roles. The most common genome-wide assay for identifying TFBSs is chromatin  
70 immunoprecipitation followed by high-throughput sequencing (ChIP-seq) [15-17]. In  
71 addition to highlighting potentially active regulatory DNA elements by direct  
72 measurement, ChIP-seq data can define specific DNA sequence motifs that can be  
73 used, often in conjunction with expression data and chromatin accessibility maps, to  
74 infer likely binding events in other cellular contexts without direct assays. Elegant  
75 methods have been developed for identifying motifs [18-21], including ones that  
76 consider the plasticity of individual bases within and adjacent to a motif [22-25], account  
77 for structural details in relation to TF co-occurrence [26-28], or incorporate directly  
78 measured and inferred motifs [4]. Subsets of motifs can be specific to different cell types  
79 or environmental contexts, and can depend on chromatin status and presence of  
80 cofactors for accessibility [29,30], and motif sequence alone is not always predictive of  
81 binding events [31-33]. While motifs identified by enrichment in ChIP-seq are often

82 representative of direct binding, this is not always the case, as co-occurrence of other  
83 DAPs could lead to the enrichment of their motifs. Further, the ChIP-seq method  
84 identifies both protein:DNA and, indirectly, protein:protein interactions, such that indirect  
85 and even long-distance interactions (e.g. looping of distal elements) are captured as  
86 ChIP-seq enrichments.

87 A long-term goal for the field is comprehensive mapping of all DAPs in all cell types, but  
88 a compelling and more immediate aspiration is to create a deep map of all DAPs  
89 expressed in a single cell type. The resulting consolidation of hundreds of genome-wide  
90 maps for a single cellular context promises insights into TF/CF/CR networks that are  
91 presently not possible. It will also provide the necessary backdrop for understanding  
92 large-scale functional element assays, and should improve the ability to infer TFBSs in  
93 other cell types that are less amenable to direct measurements.

94 Previous analyses of sets of numerous DAPs have been performed [34-38]. However,  
95 the larger studies to date have assayed occupancy by transfected DAPs, often  
96 expressed ectopically and at non-physiological levels, in contrast to this study, in which  
97 we performed assays on endogenous proteins expressed at physiological levels. This  
98 work in the HepG2 hepatocellular carcinoma cell line is part of the Encyclopedia of DNA  
99 Elements (ENCODE) Consortium effort toward achieving “factor completeness” (e.g.,  
100 the mapping of all expressed DAPs’ binding locations) in a subset of commonly used  
101 human cell lines. We present here an analysis of 208 DAP occupancy maps in HepG2,  
102 composed of 92 traditional ChIP-seq experiments with factor-specific antibodies and  
103 116 CETCh-seq (CRISPR epitope tagging ChIP-seq) experiments. The CETCh-seq  
104 method was developed to address the dearth of ChIP-competent antibodies for many  
105 factors, and has been shown to be a robust, powerful assay [39,40]. Its strength is that  
106 the endogenous DAPs are tagged with a universal epitope that is recognized by a single  
107 well-characterized ChIP antibody, and that the tagged factors are expressed at  
108 physiological levels to avoid ectopic ChIP peaks that can be caused by conventional  
109 transgene overexpression [41,42]. As more CETCh-seq experiments are performed, the  
110 growing database is used to identify any antibody-specific artifacts attributable to cross-  
111 reactivity. This is part of the ENCODE Consortium quality control process for ChIP-seq,

112 CETCh-seq, and related assays [43], which includes immune reagent validation and  
113 characterization by assays such as western blots, and validation of tagged cell lines by  
114 confirmation of genomic DNA sequence. Additionally, the hundreds of ChIP  
115 experiments performed have led to tuning and optimization of protocols in efforts to  
116 alleviate technical biases [44,45]. Results of validation experiments for all DAPs  
117 assayed here are available on the ENCODE web portal, at [www.encodeproject.org](http://www.encodeproject.org).

118 Of the >1,600 total human DAPs, approximately 960 are expressed in HepG2 cells  
119 above a threshold RNA value of 1 FPKM (Fragments Per Kilobase of transcript per  
120 Million mapped reads), the minimum level at which we have obtained successful ChIP-  
121 seq and CETCh-seq results. The resource we present here contains ChIP-seq and  
122 CETCh-seq maps for ~22% of these 960 factors, of which 171 are sequence-specific  
123 TFs and 37 are chromatin regulators and transcription cofactors (Figure 1A and  
124 Supplementary Table 1). This large and unbiased sampling in one cell type allowed us  
125 to approach analysis from complementary directions, beginning with patterns of DAP  
126 occupancy and co-occupancy to find preferential associations with each other and with  
127 promoters, enhancers, or insulator functions, and in the other direction, working from  
128 genomic loci, sequence motifs, and epigenomic state to explain occupancy.

129 All ChIP-seq/CETCh-seq data are available through the ENCODE web portal  
130 ([www.encodeproject.org](http://www.encodeproject.org)), as well as at Gene Expression Omnibus. Each DAP's  
131 genome-wide binding sites were identified using the SPP algorithm [46], with replicate  
132 consistency and peak ranking determined by Irreproducible Discovery Rate (IDR)  
133 [47]. This publicly available ENCODE occupancy data, attaining the greatest factor  
134 depths at physiologically-relevant expression levels to date, together with analyses and  
135 insights presented here, comprise a key resource for the scientific community.

136

## 137 **Results**

### 138 **DNA-associated proteins segregate underlying element types and states**

139 As an initial analysis, we asked how the binding of each of the 208 DAPs is distributed  
140 in the genome relative to known transcriptional promoters. Specifically, we calculated  
141 the fraction of called peaks within 3 kilobases (+/- 3 kb) of transcription start sites  
142 (TSSs) for each factor, analyzing only TSSs of genes expressed ( $\geq 1$  TPM, or  
143 Transcripts Per Kilobase Million) in HepG2 (Figure 1B) and, separately, all annotated  
144 TSSs regardless of expression (Supplementary Figure 1).

145 To further summarize the occupancy landscape, we merged all the called peaks from  
146 every experiment into non-overlapping 2 kb windows, limited to those windows in which  
147 two or more DAPs had a called peak, and performed a Principal Component Analysis  
148 (PCA) on these DNA segments, using presence/absence of each DAP at each  
149 segment. This analysis captured global patterns of ChIP-seq peaks, with Principal  
150 Component 1 (PC1) explaining ~28% of the variance and correlating strongly with the  
151 number of unique DAPs associated with a given genomic region (Figure 1C). PC2  
152 separates promoter-proximal from promoter-distal peaks, underscoring the relevance of  
153 promoters as a major predictor of genomic state and DAP occupancy. Interestingly, the  
154 shape of this plot suggests that as the number of DAPs associated at a locus increases,  
155 the promoter-proximal and promoter-distal regions lose separation along PC2.  
156 Additionally, PC2 plotted against PC3 shows strong segregation based on occupancy of  
157 the factor CTCF (Figure 1C), suggesting discrete genomic demarcations attributable to  
158 this important factor, as expected for its insulator/loop anchoring functions.



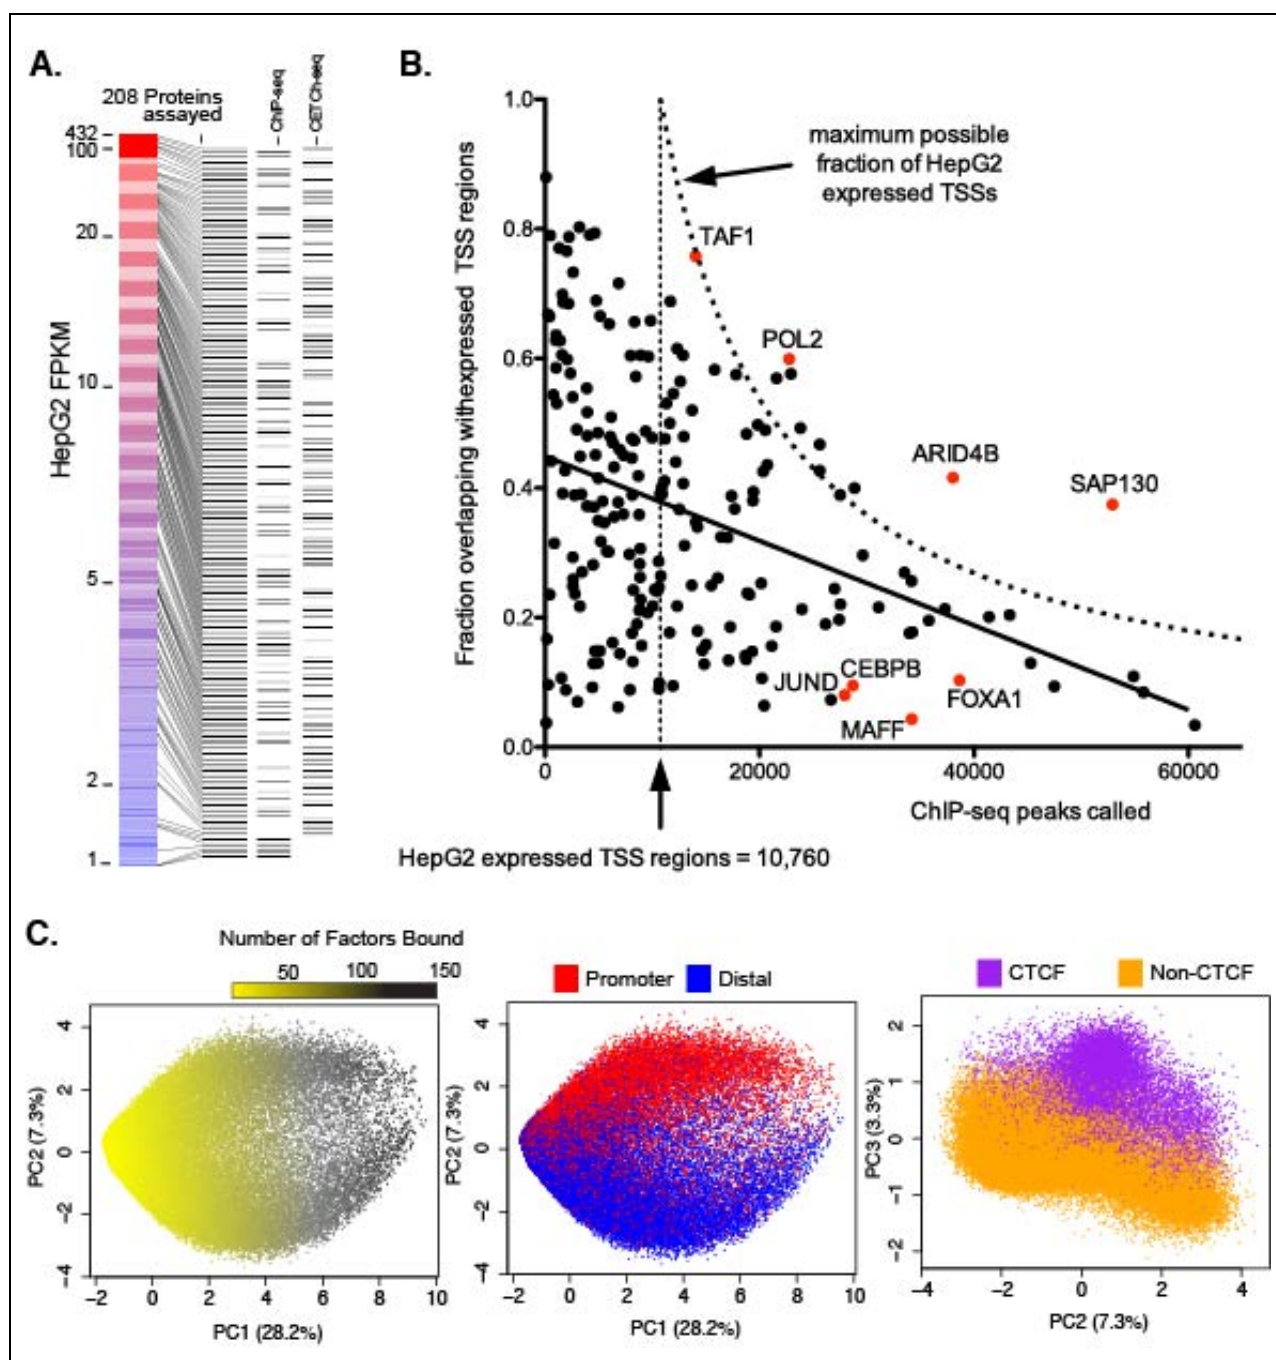

**Figure 1. Overview and analysis of HepG2 datasets** **A.** The 208 DNA-associated factors assayed in HepG2, organized by expression (FPKM), and denoting whether the factors were assayed by ChIP-seq and/or CETCh-seq. **B.** Scatter plot of all 208 factors showing broad distribution of fraction of called peaks at expressed TSSs ( $\pm$  3 kb of TSS) vs. total peak number; points beyond maximum possible fraction represent multiple peaks at single TSS regions. **C.** Plots showing PCA of genomic segments with more than two factors bound, highlighting the separation based on number of factors bound, promoter vs. distal, or the presence of CTCF.

159 To assess the epigenomic context of each binding site, we used IDEAS (an Integrative  
 160 and Discriminative Epigenome Annotation System), a machine learning method for

161 biochemical mark-based genomic segmentation [48]. This IDEAS HepG2 epigenomic  
162 segmentation inferred 36 genomic states based on eight histone modifications, RNA  
163 polymerase ChIP-seq, CTCF ChIP-seq, and DNA accessibility datasets (DNase and  
164 FAIRE). Importantly, IDEAS states for HepG2 were classified using mainly histone  
165 marks, augmented by only two DNA-associated ChIP-seq maps included in our dataset  
166 (CTCF and RNA polymerase). Thus, our analyses using IDEAS segmentation are not  
167 circular, as they would be if the segmentation had used all or mostly TF binding data as  
168 input. These segregate the anticipated major classes of correlations between  
169 epigenomic states in the IDEAS segmentation and DAP associations, such as  
170 enrichment of H3K4me3 at annotated promoters and H3K27ac at candidate active  
171 enhancers, as well as open chromatin status as assayed by DNA accessibility  
172 experiments, typical of TF-bound DNA. As expected, the resulting IDEAS states  
173 classified only a minority of the HepG2 genome as potential cis-regulatory elements  
174 (Supplementary Figure 2).

175 Clustering of DAP peak calls by the IDEAS segments of these genomic loci delineated  
176 several clear bins of genomic state associations. Specifically, we found a subset of  
177 DAPs that are preferentially associated with promoters, another subset associated with  
178 candidate active enhancers, and a third group distributed across both proximal promoter  
179 regions and likely enhancers (Figure 2A). We also found two smaller DAP-associated  
180 clusters: one associated with heterochromatin/repressed marks (including BMI1 and  
181 EZH2, both part of the polycomb repressor complex), and one with CTCF regions  
182 (including CTCF and known cohesin complex proteins RAD21 and SMC3) (Figure 2A,  
183 Supplementary Table 2). These distinct categories contain members of different classes  
184 of DAPs, and point to distinct gene regulatory pathways. Additionally, a PCA based on  
185 these IDEAS states clearly segregated the DAPs into bins that recapitulate these  
186 clusters (Supplementary Figure 3).

187 For roughly 40% of the DAPs assayed, most called peaks were in IDEAS promoter-like  
188 regions, while ~30% of DAPs were predominantly associated with IDEAS enhancer-like  
189 regions (Figure 2B). There was no significant correlation between experimental peak  
190 counts and the distribution of peaks across promoters and enhancers. While these



191 preferences are part of a continuous distribution, the unsupervised clustering using all  
192 IDEAS genomic states suggests strong localization preferences among subsets of  
193 DAPs. The three largest subsets reveal that many DAPs are strongly enriched for  
194 promoters, while others are strongly associated with candidate enhancers, implying  
195 separable functions for the two classes of most differentiable factors. The third group in  
196 the continuum shows little or no bias, associating more equally with both promoters and  
197 enhancers. Previous publications have noted the similarities between promoters and  
198 enhancers, ascribing enhancer activity to promoters, and it is established that  
199 transcription occurs directly at enhancers in the form of enhancer-RNA (eRNA) and  
200 even as alternative promoters [49,50] (and reviewed in [51]). The subset of DAPs  
201 identified as associating with both promoters and enhancers may point to specific  
202 genomic loci or gene regulatory networks where the lines between promoters and  
203 enhancers are most blurred. It is also possible that the factors in this group are most  
204 associated with looping between promoters and distal enhancer elements. Because  
205 DAPs localize to specific genomic states, we were able to reproducibly train random  
206 forest models capable of predicting the IDEAS state of a genomic region using binding  
207 information of only a small number of DAPs (Figure 2C). The prediction method was  
208 successful when using the combination of TFs/CFs/CRs, and also when trained only on  
209 direct DNA-binding proteins or only on CFs/CRs, requiring a subset of any of ~30 DAPs  
210 to achieve ~80% accuracy.

## 211 **Liver-specific TFs and genes reveal the cis- and trans-networks of** 212 **HepG2**

213 Identifying transcription networks is important for understanding how genes specify a  
214 cell type and execute its activities. Our current understanding is that TFs, including key  
215 cell-type specifying factors, interact with other factors via combinatorial cross-regulation  
216 to drive gene expression in a cell-specific manner. To identify HepG2-specific cis-  
217 regulatory elements, we used IDEAS segmentation to identify all promoter-like and  
218 enhancer-like regions in at least one of five other cell lines (GM12878, H1hESC,  
219 HUVEC, HeLa-S3, and K562), and filtered these regions from the HepG2 segmentation.  
220 In the resulting set of 59,115 putative HepG2-specific cis-regulatory regions, we found

221 significant enrichment (Fisher's exact test, adjusted p-value <0.001, BH FDR corrected)  
222 of distinctive DAPs at HepG2-specific enhancer loci, including known liver-specific TFs  
223 such as HNF4A, HNF4G, CEBPA, and FOXA1, along with additional DAPs not  
224 previously associated with liver cell identity such as TEAD1, RXRB, and NFIL3 (Figure  
225 2D).

226 Because HepG2 is a cancer cell line derived from liver tissue, we focused next on liver-  
227 specific genes, filtering for genes that are highly and specifically expressed in liver and  
228 also expressed in HepG2 at levels of at least 10 TPM. This identified a total of 57 key  
229 liver/HepG2 specific genes. We then examined the peak calls of all 208 DAPs close to  
230 promoter regions of the 57 liver specific genes (+/- 2 kb from TSSs), finding between 13  
231 and 148 proteins associated with promoters of these genes. Pioneer TFs (capable of  
232 binding closed chromatin and usually involved in recruiting other factors [52,53]) such  
233 as FOXA1, FOXA2, and CEBPA, as well as key chromatin regulators such as EP300,  
234 associate with most of the 57 liver-specific genes (Figure 2E). Of note, the promoters of  
235 the very highly expressed liver genes *ALB*, *APOA2*, *AHSG*, *FGA*, and *F2* (also known  
236 as thrombin) have very high apparent factor occupancy/association: 65, 148, 124, 114,  
237 and 130 DAPs, respectively (Figure 2E, Supplementary Figure 4). We examined DAP  
238 occupancy at the promoters of all genes as well as of those genes expressed at 10  
239 TPM or higher in HepG2, and compared these to DAP occupancy at the 57 liver-specific  
240 genes (Supplementary Figure 5, Supplementary Table 3). In each analysis, increasing  
241 factor number correlates positively with increasing RNA level. We note that some prior  
242 studies have suggested that high TF occupancy at highly expressed loci is a technical  
243 artifact of ChIP-seq [54], but, as described below in the section on HOT sites, several  
244 lines of evidence argue that these signals represent true biology. The 57 liver-specific  
245 genes have significantly higher expression (rank percentile t-test; p-value < 0.0001)  
246 when compared to other genes matched by number of DAPs, indicating a trend toward  
247 higher expression associated not only with a higher number of associated DAPs but  
248 with specific factor identities. We expanded our analysis to all genes that have higher  
249 expression than expected based on the number of DAPs associated at their promoters,  
250 identifying the particular factors enriched near these genes. For each of these DAPs, we  
251 then filtered all genes with ChIP-seq peaks called for the particular factor, ranking the

252 expression of those genes against that of other genes with near-equal number of  
253 associated factors (within 5% of the number of associated factors). We identified DAPs  
254 that are associated with higher than expected expression, including unsurprising factors  
255 such as PAF1 and RNA polymerase II subunit A (Ser2 phosphorylated), marks of active  
256 transcription, as well as ATF4 and HSF1 (Supplementary Figure 5). However, we note  
257 that there are still many DAPs that have not yet been assayed by ChIP-seq, and this  
258 could explain some of the deviation from expected expression.

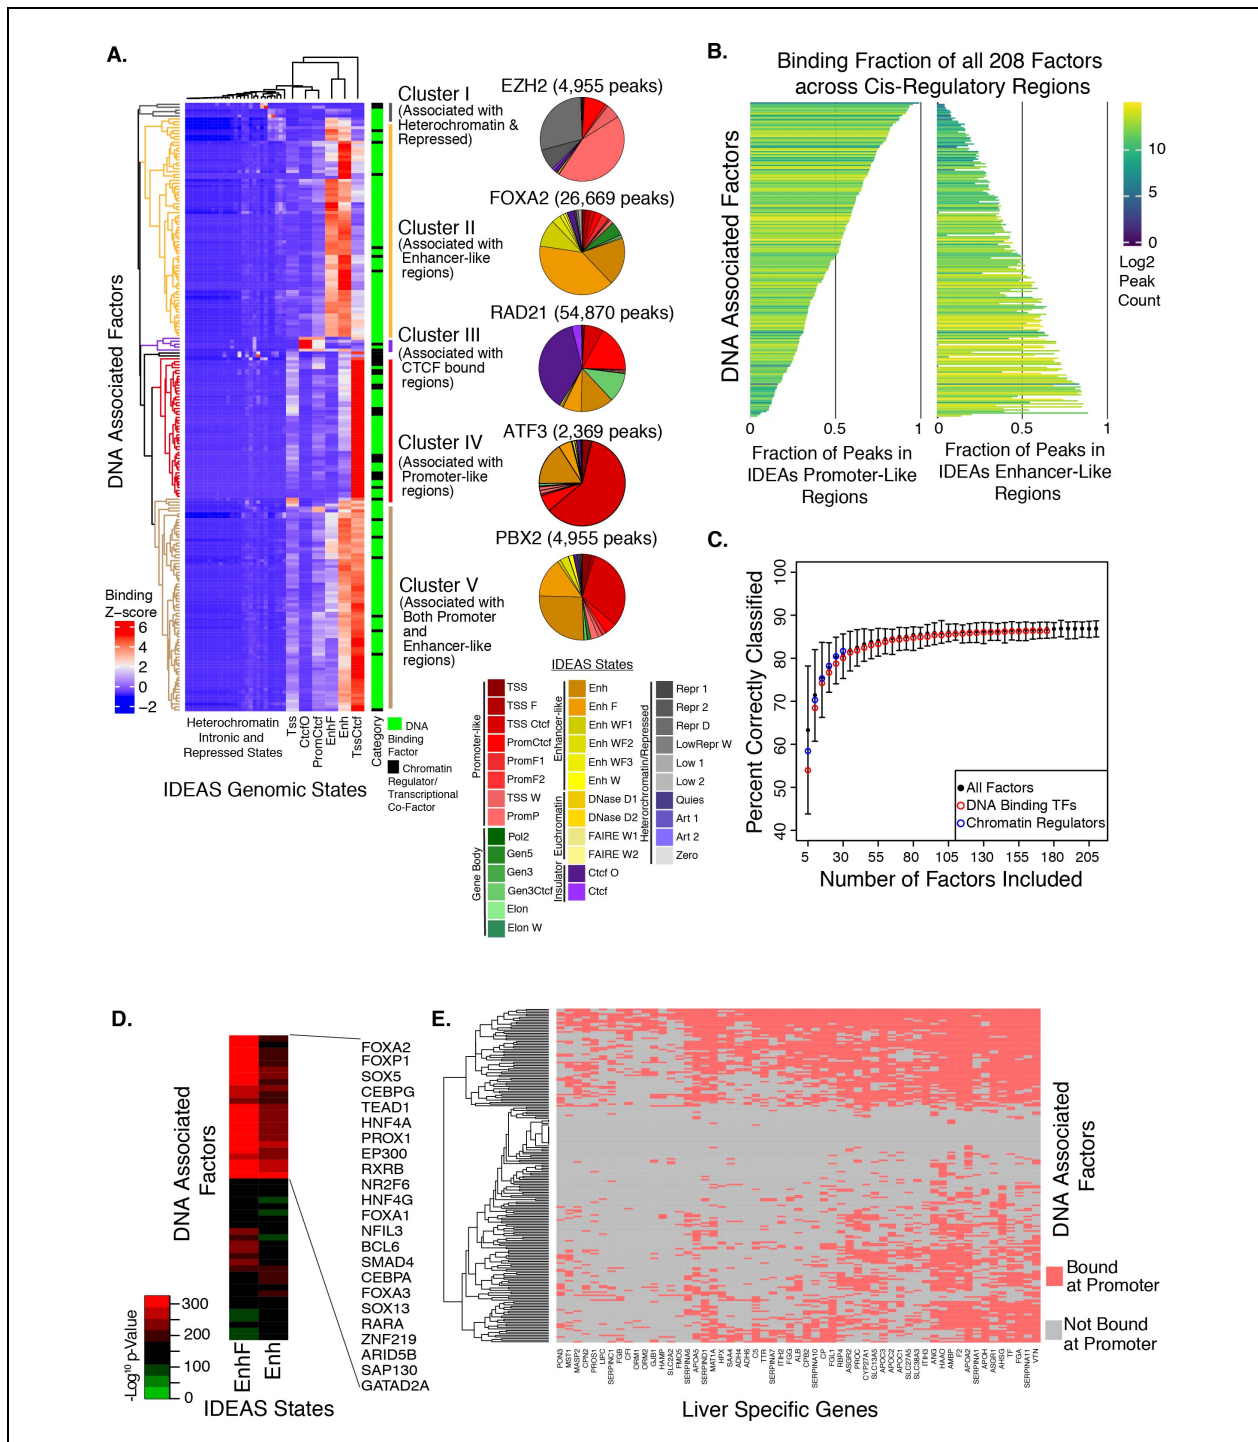

**Figure 2. Landscape of factor binding to regulatory states. A.** Unsupervised clustering of the 208 factors based on the binding enrichment at 36 IDEAS genome states and the 5 main clusters of factors, along with pie charts showing absolute binding fractions of an example of a factor from each cluster. **B.** Plot showing the fraction of promoter or enhancer binding for all 208 factors, with bars colored based on peak counts for each factor. **C.** Predictive ability of random forest classification of genomic regions as either enhancer or promoters based on number of factors used to train the algorithm. **D.** Enrichment of TFs at regions of the genome we classified as putative HepG2-specific cis-regulatory elements. **E.** Binding of TFs to liver specific gene promoters.

## 259 **Distribution of DNA-associated proteins in putative cis-regulatory** 260 **elements**

261 Though the 208 factors do not represent a complete catalog of all expressed factors in  
262 HepG2, we asked how much of the regulation in this cell line is captured by this partial  
263 compendium. We used IDEAS to define a set of 370,570 putative HepG2 cis-regulatory  
264 elements classified as promoters, “strong” enhancers, or “weak” enhancers (according  
265 to standard segmentation terminology). Discrete regions were specified by the IDEAS  
266 genomic segmentation, and were cataloged independent of their individual sizes, with  
267 merging of similar features within 100 base pairs (bp). This resulted in a broad size  
268 distribution, ranging from 200 bp to 12-16 kb; the larger segments usually represented  
269 locus control regions, divergent promoters (large, bidirectional promoters), or other  
270 similar significantly large genomic features (Supplementary Figure 6). We then  
271 calculated how many DAPs were associated in each of the 370,570 regions  
272 (Supplementary Figure 6). In terms of the general distribution of DAPs across all  
273 putative regulatory regions with called peaks, there are on average seven DAPs  
274 associated at any region, while 18% of the regions have only 1-5 called DAPs.  
275 Approximately 67% of the chromatin regions do not contain any called peaks; however,  
276 the vast majority of these (~85.5%) are classified as “weak” or “poised” enhancers by  
277 the IDEAS segmentation, and this class of elements is most likely to have the fewest  
278 number of associated factors and would therefore be more sensitive to completeness of  
279 assayed factors. It is also possible that these elements have undetectable levels of DAP  
280 occupancy or do not associate with any DAPs at all. Conversely, elements classified as  
281 promoters and “strong” enhancers by IDEAS are enriched for occupancy by higher  
282 numbers of DAPs (Supplementary Figure 6). Of the IDEAS-determined active promoter-  
283 like regions in the HepG2 genome, 61% contain a called peak for at least one DAP in  
284 this dataset, and of the “strong” enhancer-like regions, 75% contain at least one called  
285 peak. This analysis shows that the majority of promoters and “strong” IDEAS-modeled  
286 enhancers have one or more DAPs associated, and that these occupied elements  
287 display an unexpectedly high average of 15 and 18 called per region, respectively.

288 Thus, these data capture a substantial overview of the TF/CF/CR regulatory network in  
289 HepG2 cells.

## 290 **Motif analysis reveals direct binding targets and factor associations**

291 We assessed motif enrichment in peaks, and found many previously derived motifs for  
292 both direct and potentially indirect associations, as well as a small number of potentially  
293 novel motifs. To derive and map motifs for each factor, we used the MEME software  
294 suite, TOMTOM, and Centrimo [20,21,55-58] to call and assess motifs for each  
295 experiment. We focused only on motifs called from the 171 putatively direct DNA-  
296 binding TFs in our dataset, based on previous curation [2], filtering these motifs by  
297 significance (MEME E-value  $<1e-05$ ) and enrichment (CMO E-value  $<1e-10$ ) to obtain a  
298 high-confidence set of 293 motifs called from 160 TFs. We compared these motifs to  
299 the JASPAR databases [59,60] and to the CIS-BP database [4] to determine whether  
300 our *de novo* derived motifs matched previous findings from various *in vivo* and/or *in vitro*  
301 assays [61]. Overall,  $>80\%$  of the 293 motifs had a similar motif in these databases  
302 (86% in CIS-BP build 1.02, 82% in JASPAR2018, 81% in JASPAR2016; Supplementary  
303 Figure 7). For 103 motifs derived from peaks for 77 unique TFs, the most similar motif in  
304 the database was annotated as the motif for the TF which was the target of the  
305 ChIP/CETCh-seq assay, and we term these cases “concordant” (Figure 3A,  
306 Supplementary table 4). There were 163 motifs derived from peak data for 103 TFs that  
307 were more similar to the database motif of a different TF, and we denote these as  
308 “discordant”. We also observed 27 motifs derived from peaks of 17 TFs that were highly  
309 dissimilar to any motifs in the databases and may be novel motifs; most of these were  
310 from Zinc-Finger TFs, a large class of factors that is virtually unassayed by endogenous  
311 ChIP-seq.

312 Examining the 163 discordant motifs, we observed an enrichment of motifs representing  
313 pioneer TFs such as FOXA1, and we hypothesize that these motifs were called due to  
314 their significant co-occurrence with the assayed TFs. Previous studies have noted the  
315 enrichment in ChIP-seq data of sequences that do not appear to be binding motifs for  
316 assayed TFs, but rather are more similar to other TF motifs [62]. There are multiple



317 potential explanations for why the ChIP-seq derived motif would most closely match a  
318 motif previously annotated for another factor. Related TFs often recognize very similar  
319 sequence motifs; for example, the motif we derived for TEAD4 was very similar to the  
320 motif previously found for TEAD1 [63]. There are also instances where a factor lacks a  
321 strong and specific DNA binding domain and no motif would be expected unless the  
322 motif represents a frequent co-binding partner, a scenario we explore below with  
323 GATAD2A, and also seen with HMG factors. A similar explanation involves a particular  
324 TF acting as an “anchor” at a locus, and through either direct protein:protein  
325 interactions, or by inducing an open chromatin environment, behaves as the mechanism  
326 for localization of other proteins to that region of DNA. A well-studied example of this  
327 highlighted in our data was the enrichment of the CTCF motif in RAD21 ChIP-seq, as  
328 RAD21 lacks a DNA-binding domain but is known to interact with CTCF. It is difficult to  
329 confidently determine whether a discordant motif represents a key co-factor interaction  
330 or a commonly co-localized protein. We note that when we called multiple, distinct, high-  
331 confidence motifs in a single ChIP-seq experiment, with one motif annotated in  
332 databases as the direct target of the assayed TF and another motif representing a  
333 different TF that we also assayed separately, we were able to observe from the  
334 secondary factor’s ChIP-seq experiment that both TFs are likely associated at these  
335 loci, since both experiments yielded called peaks at these loci.

336 Supporting our hypothesis that the secondary factor’s motif was not a site of direct  
337 binding for the primary factor, an examination of the precise location of the motifs within  
338 peaks showed a significant difference (K-S test p-value < 2.2e-16) where the direct  
339 matching motifs of the assayed factors are closer to the center of called peaks, and the  
340 discordant motifs for other TFs are more offset, providing evidence for co-occurrence at  
341 these locations (Figure 3B). Direct interaction and co-recruitment between these pairs of  
342 TFs could explain these observations, and numerous examples of such combinatory  
343 and cooperative activities between TF pairs have been reported (reviewed in [64]). We  
344 also found no significant trend for secondary TF motifs in any factor clusters we  
345 identified by IDEAS state preferences or other methods, suggesting that no biases were  
346 introduced by contributions from particular genomic loci (Supplementary Figure 8).  
347 Additionally, we analyzed the peak locations of the 27 novel motifs (representing 17

348 factors) that were highly dissimilar to any motifs in CIS-BP, and the majority showed  
349 enrichment at the center of peaks (Supplementary Figure 9), supporting the notion that  
350 these motifs represent direct DNA binding for these factors.

351 To better understand discordant TF motif calls, we constructed a similarity heatmap  
352 using all 293 high-confidence motifs from our data and the motif for each assayed TF  
353 annotated in the CIS-BP database (n=733) as provided by the MEME suite software  
354 (Figure 3C). This analysis clustered TFs both by similarity of their direct binding motifs  
355 (such as all Forkhead factors) and by co-occurrence with other motifs. In this way, we  
356 were able to identify TFs that associate at genomic loci near particular motifs, such as  
357 CTCF. Most obvious was a set of 37 factors for which a Forkhead motif was called,  
358 indicating the high prevalence of this motif in HepG2 at enhancers and promoters, and  
359 the key role of factors such as FOXA1 and FOXA2 in the gene regulatory network in  
360 these cells. We examined these cases using our ChIP-seq data from six FOX TFs  
361 (FOXA1, FOXA2, FOXA3, FOXK1, FOXO1, and FOXP1), asking how often each of  
362 these FOX TFs yielded called peaks with a FOX motif that overlapped with a peak for  
363 any of these 37 other factors, and we found that most of the 37 contained a FOX peak  
364 with FOX motif in about 20% of their peaks, with FOXA1 and FOXA3 motifs being the  
365 most common (Figure 3D).

366 We next examined the location of the FOX motif in the overlapping peaks and found  
367 that all were offset to varying degrees, though always with median distance more than  
368 20 bp from the center of peaks (Figure 3D). Additionally, we examined all peaks called  
369 for each of the 37 factors and identified the fraction containing a primary motif specific to  
370 the individual factor along with a FOX motif, the fraction containing only the primary  
371 motif, the fraction containing only a FOX motif, and the fraction containing neither motif  
372 (Supplementary Figure 10). For most of the 37 factors, the majority of peaks did not  
373 contain a primary motif, a result that may indicate protein:protein interactions and/or  
374 looping events in these peaks. Further, examining peak overlaps between these 37  
375 factors and the six FOX TFs, we observed varying associations and co-occupancy  
376 partners, including factor preferences for individual FOX TFs, as well as a cluster of

377 components of the nucleosome remodeling and histone deacetylase (NuRD) complex  
378 (Supplementary Figure 10).

379 We also found that motif information alone was predictive of genomic segments, clearly  
380 showing segregation between IDEAS states in a PCA (Figure 3E). A random forest  
381 algorithm trained only on motifs was able to predict IDEAS states almost as well as the  
382 method trained on ChIP-seq peaks, achieving ~80% success with any ~40 motifs  
383 (Figure 3F).

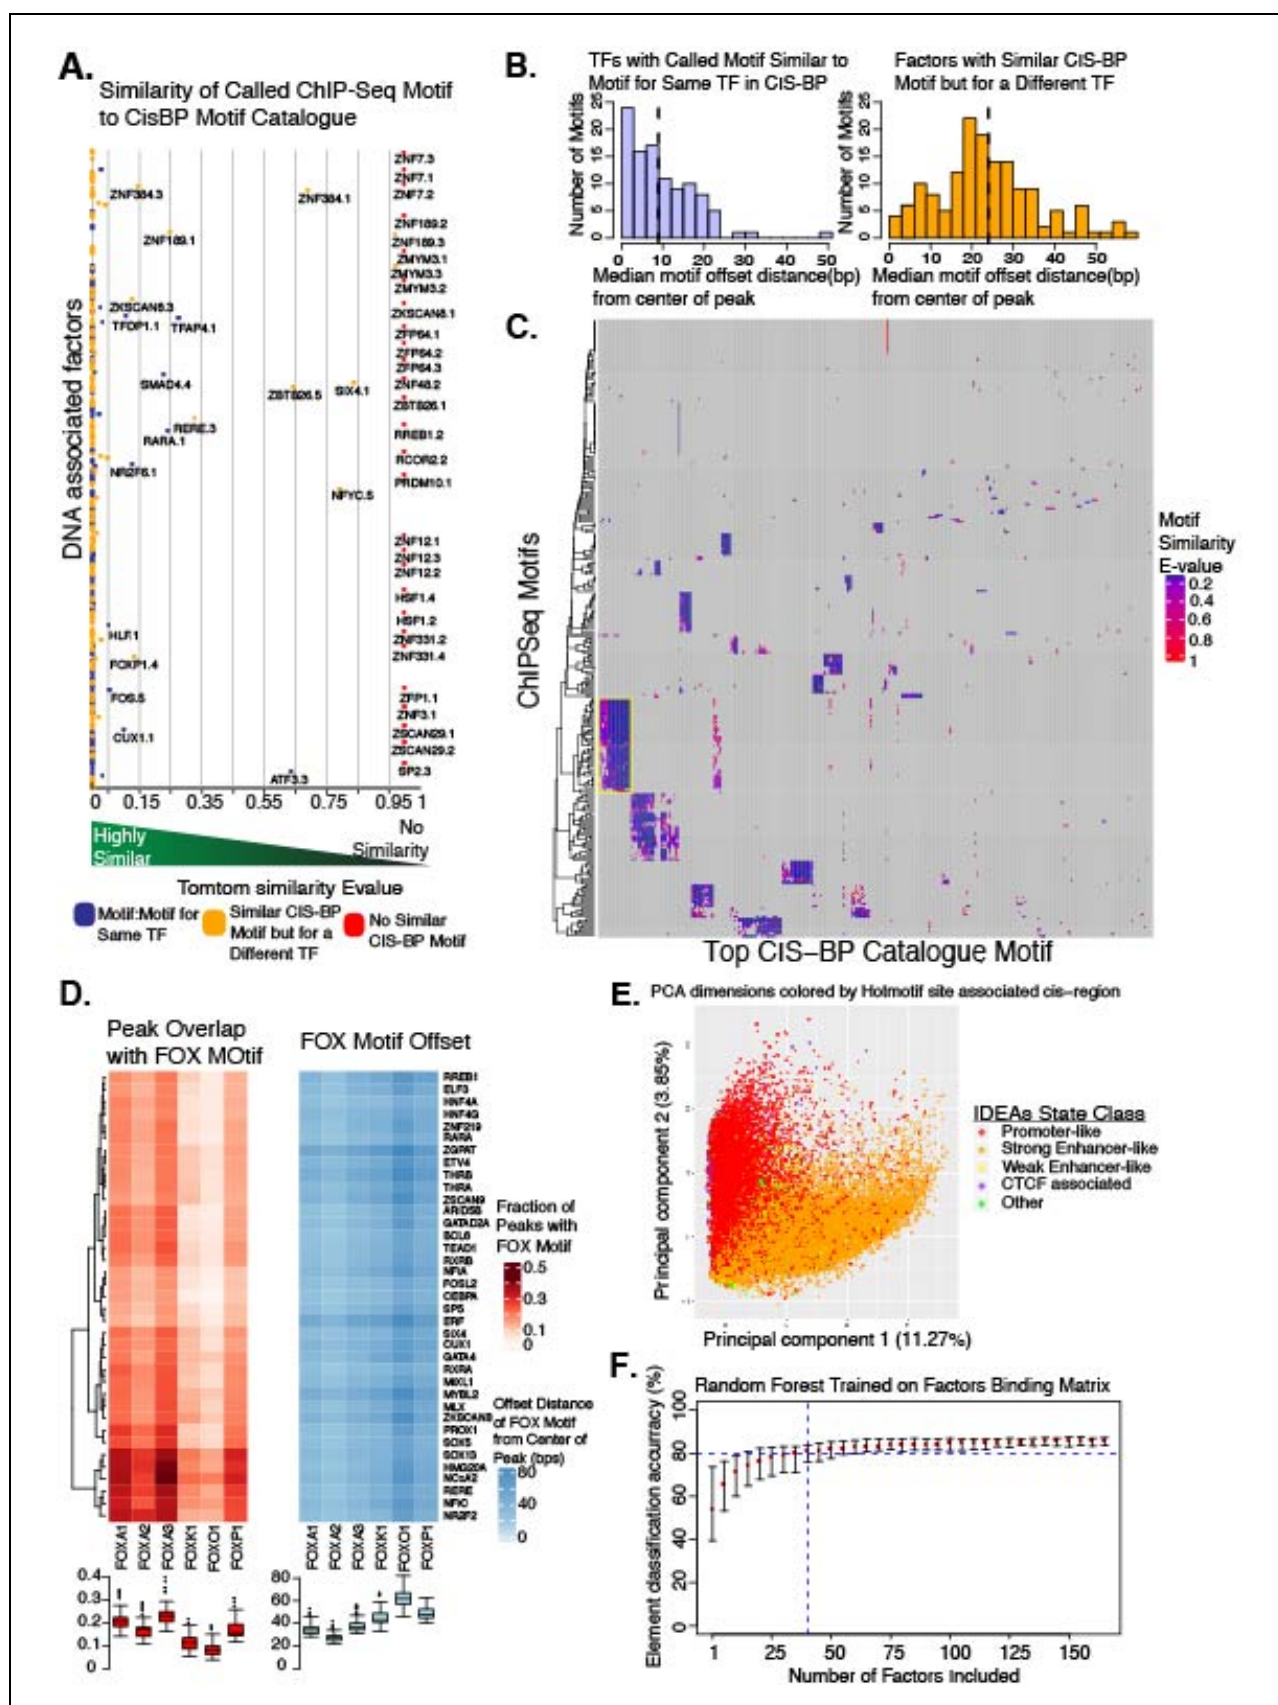

**Figure 3. Motif Identification and Analysis.** **A.** The 293 high-confidence motifs derived from analysis of the ChIP-seq data were quantitatively compared to all (human) motifs in the CIS-BP database and plotted based on similarity scores. Blue points represent motifs that matched the assayed factor, yellow points represent motifs that match a factor other than the one assayed, and red points represent motifs not similar to any in CIS-BP. **B.** Histograms showing the distance from the center of the ChIP-seq peak for motifs that match the TF, and for motifs that do not match the TF. **C.** Clustered heat map showing the similarity of all 293 significant motifs to 733 motifs from CIS-BP for the assayed factors. **D.** Further analysis of the cluster containing 37 factors that had FOX family motifs, showing the overlap of FOX TF binding in these peaks, as well as the median offset of the FOX motif from center of the ChIP-seq peaks. **E.** PCA showing separation of motifs that fall in promoters vs. those that fall in enhancers. **F.** Prediction accuracy for calling whether an element is a promoter or enhancer based on motifs present.

384

### 385 **Known and novel associations between factors**

386 TFs and chromatin regulatory proteins can interact with and recruit other DAPs through  
387 direct and indirect physical association. While the activity of a few key TFs may be very  
388 important for cell-state expression, it is likely that combinatorial events are necessary to  
389 fine tune expression [65]. We found both known and novel associations by examining  
390 occupancy overlaps and trends in a variety of analyses.

391 To identify candidate co-occupancy events mediated by direct DNA binding or by  
392 indirect interactions, both of which produce peaks in ChIP-seq data, we performed  
393 several analyses. We used the PCA of the protein-bound genomic loci described above  
394 (in which genomic loci clustered according to the DAPs associated at each region;  
395 Figure 1C-E), and generated a correlation matrix based on the cumulative principal  
396 component distances (weighted by the proportion of variance explained by each  
397 component) between all DAPs. The resulting unsupervised clustering of respective  
398 pairwise distances highlighted punctate groups representing both known and potentially  
399 novel complexes, including a group containing POL2 and TSS-associated chromatin  
400 modifying enzymes, a group of cohesin complex members, a group of liver-specific  
401 factors, and a group containing the NuRD complex, among others (Figure 4A).

402 We performed read count Spearman correlations between all 208 DAPs by calculating  
403 raw sequencing counts at every unique locus present in called peaks in any experiment  
404 (+/- 50 bp from peak center). The resulting correlation heatmap also showed clusters of  
405 related proteins as well as both known and potentially novel interactions  
406 (Supplementary Figure 11). Network plots based on pairwise peak overlaps highlighted  
407 a number of known interactions, including CTCF/RAD21 and CEBPA/G networks, as  
408 well as DAPs that associate with a large number of other factors, usually chromatin  
409 regulatory proteins such as SAP130, GATAD2A, and ARID5B (Figure 4B). We  
410 examined the associations at the level of called motifs by finding the peaks in each  
411 experiment where a specific called motif was present, limiting the analysis to the 293  
412 high-confidence motifs from the 171 TFs in the data set. Upon identification of the  
413 primary motif, we looked for associations between motifs 1-40 bp away (Supplementary  
414 Figure 12). This analysis reveals the TFs (and motifs) that are more likely to associate  
415 with any other particular TF's motif. Of note, we observed that RAD21 is highly  
416 associated with CTCF motifs, as expected, and we also found several other known  
417 complexes as well as some novel associations. We found that FOXA1 peaks with the  
418 canonical Forkhead motif are more likely to contain relatively few motifs for other  
419 factors, but that many factors, such as HNF4A, HNF4G, and RXRB, are enriched for  
420 nearby FOXA1 motifs.



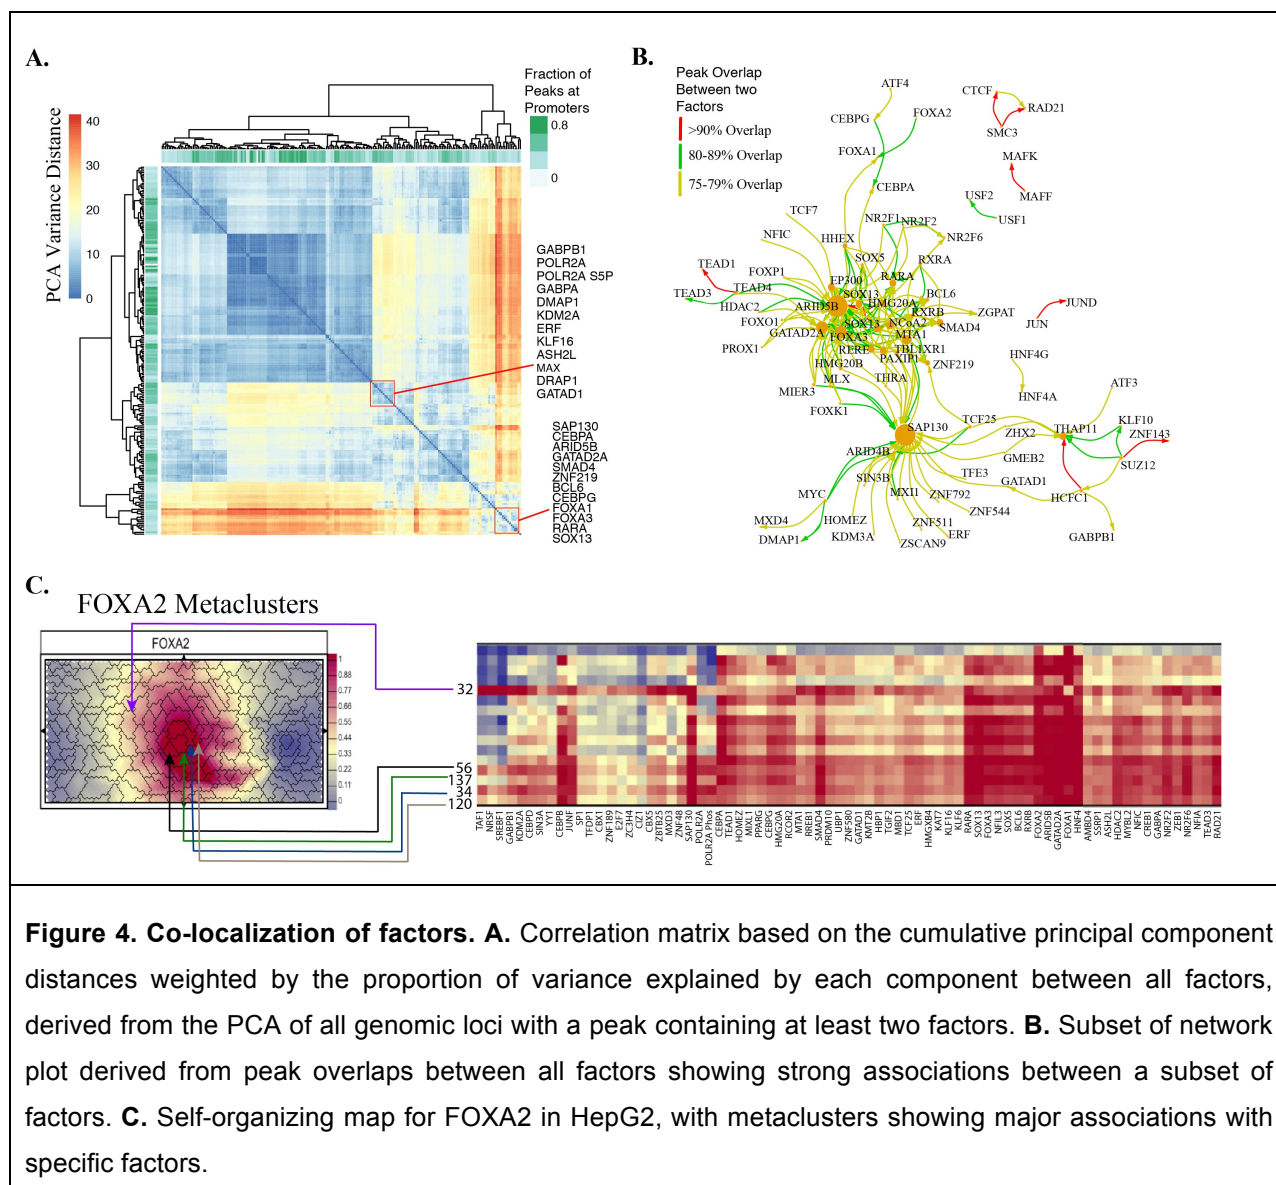

**Figure 4. Co-localization of factors.** **A.** Correlation matrix based on the cumulative principal component distances weighted by the proportion of variance explained by each component between all factors, derived from the PCA of all genomic loci with a peak containing at least two factors. **B.** Subset of network plot derived from peak overlaps between all factors showing strong associations between a subset of factors. **C.** Self-organizing map for FOXA2 in HepG2, with metaclusters showing major associations with specific factors.

421

422 For an independent assessment of co-occupancy, we trained a chromatin self-

423 organizing map (SOM) [66] using all 208 DAPs with the SOMatic package [67]. This

424 analysis generated 196 distinct clusters of SOM units, with each such “meta-cluster”

425 sharing similar profiles, and corresponding decision trees that trace the supervised

426 learning path used to determine the unique features of each metacluster profile (Figure

427 4C, Supplementary Figures 13, 14). Focusing on the key HepG2 transcription factors

428 FOXA1/2 and HNF4A, we found that 18 distinct metaclusters accounted for nearly half

429 of the peaks for these 3 TFs (43% for FOXA1, 43% for FOXA2, and 49% for HNF4A).

430 DAPs important for liver development, nucleosome remodeling, and the cohesin  
431 complex show high co-binding signal in these key 18 metaclusters.

432 Looking closer at the DAPs that distinguish these 18 key clusters, we found that five of  
433 these (numbered as 32, 34, 56, 120, and 137) show strong signal from CEBPB,  
434 SAP130, and RAD21 (Figure 4C, Supplementary Figure 13). In particular, metacluster  
435 32 had a collection of unique features related to the NuRD complex and liver processes  
436 (Supplementary Figure 13). A decision tree trained on regions in this cluster highlighted  
437 the presence of TAF1 and MTA1 (part of the NuRD complex) and the absence of a high  
438 signal of KLF16 (a known TF displacer) as sufficient to predict association with MBD1,  
439 HBP1, and HDAC2 (a sub-unit of the NuRD complex) with ~91% accuracy. GREAT  
440 (Genomic Regions Enrichment of Annotations Tool [68]) analysis of these regions  
441 revealed a related set of negative regulation and response GO terms (Supplementary  
442 Figure 13), which provides further evidence that the NuRD complex is involved in tissue  
443 specific gene regulation.

444 The indirect motif, co-occupancy, and SOM analyses led us to find novel factors  
445 associated with GATAD2A, a core component of the NuRD complex. GATAD2A has  
446 been recalcitrant to antibody ChIP-seq and therefore was one of the targets for our  
447 CETCh-seq protocol. The experiments revealed that 53% of the GATAD2A peaks in  
448 HepG2 are annotated as active enhancers (Figure 5A), a surprising observation given  
449 the association of the NuRD complex with transcriptional repression and enhancer  
450 decommissioning [69-71]. GATAD2A has a very degenerate DNA binding domain, and  
451 is not predicted to bind DNA independently, and indeed we found the called GATAD2A  
452 motif to match FOXA3 (Figure 5B). In our co-association analysis in HepG2, we  
453 identified 6 factors that co-occur in discrete genomic regions with GATAD2A (Figure  
454 5C). We analyzed our GATAD2A-FLAG protein immunoprecipitation by mass  
455 spectrometry, and this revealed that multiple components of the NuRD complex also co-  
456 immunoprecipitate with GATAD2A (Supplementary Table 5). Of the GATAD2A-  
457 associated proteins, ZNF219 [72], SMAD4 [73], and RARA [74] have previously been  
458 associated with the NuRD complex (Figure 5C). We additionally identified ARID5B,  
459 FOXA3, and SOX13 as proteins associated with the known NuRD group, specifically at

460 active enhancers with enrichment of Forkhead binding sites (Figures 5B, 5C). The  
 461 classic NuRD complex has been suggested to function at enhancer regions associated  
 462 with tissue-specific gene regulation [75], and our data confirms that the core NuRD  
 463 component GATAD2A is recruited into these regions. Of note, NuRD binding at these  
 464 open and presumably active regions is thought to function through a NuRD complex  
 465 containing MBD3 and not MBD2, and our GATAD2A-FLAG IP-mass spectrometry data  
 466 confirmed this, as we observed MBD3 peptides but no MBD2 peptides  
 467 immunoprecipitated with GATAD2A (Supplementary Table 5) [76].

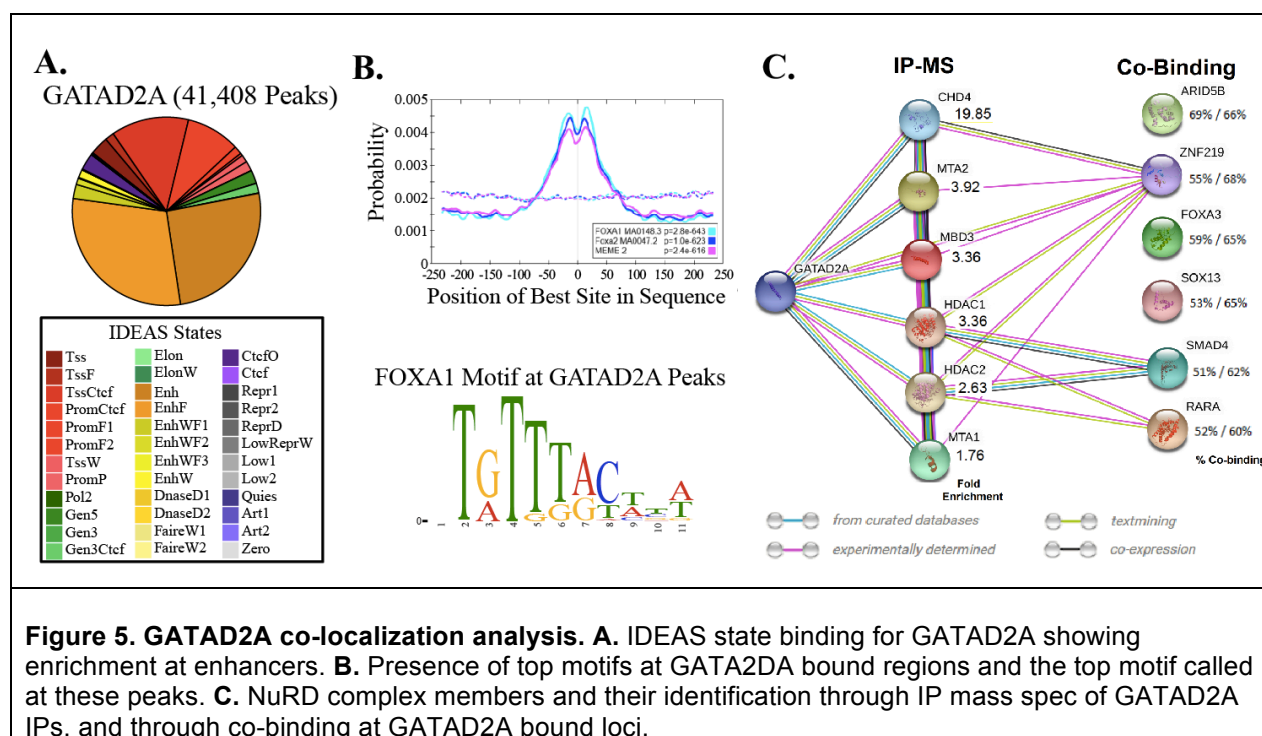

## 468 Highly occupied regions are driven by individual TF binding

469 We examined how many factors were bound at each putative cis-regulatory element by  
 470 merging all peaks from all 208 DAP experiments, with a maximum merged size of 2 kb.  
 471 This analysis yielded a total of 282,105 genomic sites with at least one associated DAP,  
 472 a mean of 7.36 associated DAPs, and maximum of 168 DAPs. We asked if certain  
 473 DAPs are more likely to co-occupy at genomic loci with a high number of other DAPs.  
 474 To answer this, we performed hierarchical clustering of the degree of co-association for  
 475 each DAP, which results in three distinct clusters (Figure 6). The first is

476 a cluster of 33 proteins,  
477 including previously  
478 described key pioneer  
479 factors such as FOXA1 and  
480 FOXA2 [77], which exhibit a  
481 low degree of co-occupancy  
482 with other DAPs at a  
483 relatively high proportion of  
484 their binding sites [78]. The  
485 second cluster, comprised of  
486 32 DAPs, displays frequent  
487 association at higher co-  
488 occupancy regions and is  
489 composed of DAPs already  
490 known to be recruited by, or  
491 to interact with, a large  
492 number of other factors,  
493 such as MYC and DNMT3B

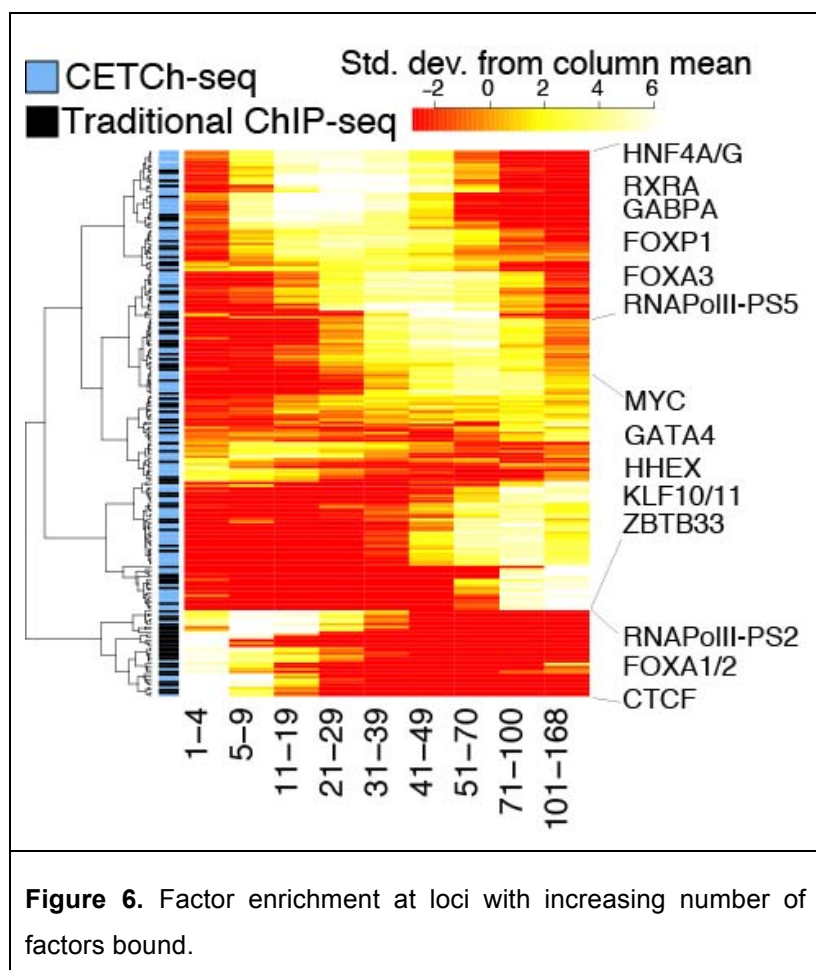

494 [79,80]. The third cluster contains the remaining DAPs, which exhibit an intermediate  
495 degree of co-occupancy, including key HepG2 TFs such as HNF4A and FOXA3.

496 As previously described [81-83], there are many regions in the genome occupied by  
497 large numbers of DAPs in ChIP-seq assays (example shown in Supplementary Figure  
498 15). There are several possibilities to explain these High Occupancy Target (HOT)  
499 regions [84]. Some researchers have filtered all or the majority of these regions from  
500 analyses under the assumption they are artifacts [54,85]. It is also possible that they are  
501 the result of stochastic shuffling of direct binding of many DAPs in a population of cells;  
502 when assayed across the millions of cells used for an individual ChIP-seq experiment,  
503 this could result in apparent co-localization of peaks for many DAPs which are not  
504 actually co-occupied at the same time in the same cell. Mechanisms underlying this  
505 might include indiscriminant recruitment driven by key factors or some unknown  
506 property of these regions of open chromatin, or by densely packed DNA sequence

507 motifs. It is also conceivable that three-dimensional genomic interactions, including  
508 enhancer looping and/or protein complexes, lead to ChIP-seq cross-linking of DAPs in  
509 close proximity.

510 We define HOT regions in these data as those sites with 70 or more DAPs within a 2 kb  
511 region (n=5,676). Intersecting HOT regions with the previously described IDEAS  
512 segmentations revealed that greater than 92% of HOT regions map to candidate  
513 promoter or “strong” enhancer-like states (42.25% and 49.88% respectively). We  
514 determined using GREAT analysis that promoter-localized HOT regions are associated  
515 with housekeeping genes and that distal enhancer HOT regions are near genes  
516 associated with liver-specific pathways (Supplementary Figure 16). Additionally, we  
517 observed that higher numbers of factors in a particular locus correlates with higher  
518 expression of the nearest gene (as discussed above) and with higher sequence  
519 conservation (Supplementary Figures 17, 18). While previous researchers have noted  
520 apparent general ChIP bias favoring highly expressed genomic regions [54], we are  
521 able to perform ChIP in untagged cells with an antibody raised against the epitope tag  
522 used in CETCh-seq experiments, normalizing for this background in peak-calling, and  
523 the HOT regions continue to be strongly enriched (data not shown).

524 We computationally examined the general DNA motif structure of the HOT sites using  
525 PIQ (Protein Interaction Quantification) [86]. Using TF footprints identified in ENCODE  
526 HepG2 DNaseI hypersensitivity data by PIQ, we observed that at a given locus the  
527 number of TF footprints is significantly positively correlated with the number of factors  
528 that have called peaks in the locus (Supplementary Figure 19). This observation was  
529 true at multiple PIQ purity (positive predictive value) thresholds and also when using TF  
530 footprints called in the same data set from JASPAR motifs. This is consistent with HOT  
531 regions having TF motif-driven architecture as a major characteristic. To determine  
532 whether factor occupancy at highly bound regions is driven by specific DNA motifs, we  
533 trained a Support Vector Machine (SVM) on “HOT-motif” sites, a set of peaks with 50 or  
534 more co-localized motifs derived from the HOT sites (n=2,040). We tested the SVM’s  
535 predictive ability as the number of TFs increased, and observed that predictions  
536 remained constant, rather than declining, further strengthening the notion that these



537 sites are not artifacts (Supplementary Figure 20). Precision Recall Area Under Curve  
538 (PR-AUC) scores for the SVM averaged at  $\sim 0.74$  for motif-level predictions, and  $\sim 0.66$   
539 for peak-level predictions, scores substantially higher than expected, given the random  
540 sample of a positive set of 5,000 sites tested against 10X GC-matched null sequences  
541 as the negative set (Supplementary Figure 21). We also found, using the k-mers  
542 generated by the SVM, that there are 1-5 TFs at each site with very high motif affinity,  
543 and  $\sim 25$ -50 TFs with degenerate or weaker motifs (Supplementary Figure 22), and this  
544 observation was true when examining both HOT-motif sites and the broader HOT sites.

545 We asked whether this observation was unique to HOT regions ( $n=5,676$ ) when  
546 compared to an equal number of enhancer regions with only 2-10 associated factors or  
547 to a null set of random enhancer elements with any number (0-208 DAPs) of associated  
548 factors (as defined by IDEAS segmentation). We observed that the sites with 2-10  
549 factors had significantly fewer numbers of both high-affinity and low-affinity TF motifs,  
550 and that the random enhancers were essentially devoid of strong motifs (Supplementary  
551 Figures 22, 23). Indeed, the distribution of SVM scores in HOT sites was significantly  
552 higher than that of the SVM scores of sites with 2-10 associated factors, and both were  
553 significantly higher than that of the null set of random enhancer elements, indicating that  
554 the information imparted by the DNA sequence of HOT sites exceeds that of other cis-  
555 regulatory elements (Supplementary Figure 24). Moreover, in HOT sites, the strongest  
556 affinity TF at any individual peak varied across sites, indicating regulatory roles  
557 attributable to many different factors. The analysis identified important liver factors, such  
558 as FOXA3, HNF1A, and CEBPA exhibiting the strongest putative motif affinity at many  
559 of these sites (Supplementary Figure 25). This supports the notion that HOT sites are  
560 driven by a few strong and specific TF-DNA interactions and non-specific recruitment of  
561 other factors, likely through both protein complexes and binding to degenerate motifs,  
562 and possibly linking together multiple distal genomic regions through DAP interactions.  
563 This further justifies the importance of generating complete DAP maps to determine the  
564 full complement of DAPs associated at each locus, an outcome that would not occur by  
565 analysis of functional motifs only.

## 566 Discussion



567 This study introduces a community data resource of occupancy maps for human  
568 transcription factors, transcriptional co-factors, and chromatin regulators that illustrates  
569 the strengths of building toward a complete catalog of DAP interactions in an individual  
570 cell type. At this intermediate stage of factor-completeness (~22% of all expressed  
571 DAPs in HepG2) the aggregated data enabled us to identify multiple known complexes  
572 and associations through various analyses, and to identify putative novel associations  
573 for future research. We also gained new insights into gene regulatory principles, clearly  
574 showing the segregation of categories of factors associated with varying localization at  
575 particular genomic states.

576 We approached our analysis from complementary directions, analyzing occupancy from  
577 the perspective of factor occupancy patterns and from the perspective of genomic loci  
578 and the factors that associate at those sites. Multiple analyses showed that some DAPs,  
579 including TFs, associate preferentially at promoters, while others, including different  
580 TFs, prefer enhancers. They are parts of a continuous distribution, and many factors are  
581 associated with both proximal and distal elements in varying degrees. This broad  
582 gradient of function among DAPs now poses questions about the underlying  
583 mechanisms.

584 The large number of factors assayed provided the capacity to identify and study regions  
585 of the genome associated with very high numbers of DAPs, compared with expectations  
586 from detailed work on specific enhancer complexes like the interferon enhanceosome  
587 [87]. Multiple lines of evidence argue that, as a group, the regions with high numbers of  
588 factors detected are neither biological noise associated with general open chromatin nor  
589 ChIP-seq/CETCh-seq technical artifacts. HOT regions have been previously described  
590 as being depleted of TF motifs, but we now suggest that this was likely due to the fact  
591 that earlier analyses lacked a large enough sampling of key TFs with strong “anchoring”  
592 motifs. Our current analyses were informed by a much larger sampling of TFs and other  
593 DAPs, and they lead us to propose a model in which HOT regions are nucleated by  
594 anchoring DNA motifs and their cognate TFs. They would form a core, with which many  
595 other DAPs can and do associate by presumed protein:protein interactions, protein:RNA  
596 interactions, and relatively weak DNA interactions at poorer sequence-motif matches.

597 Extensive apparent co-occupancy at domains possessing few or zero anchor motifs can  
598 potentially be explained when the ChIP assay captures, through presumed  
599 protein:protein fixation, non-adjacent DNA regions that associate with each other by  
600 looping interactions.

601 It is important to appreciate that the standard ChIP assay is performed on large cell  
602 populations. This means that patterns of computational co-occupancy, which we report  
603 on here, cannot discriminate between the simultaneous association of many factors in a  
604 single large molecular complex versus diversified smaller complexes that are distributed  
605 at any given time across the cell population, with each containing a smaller number of  
606 secondary associations, that sum to give massive computational co-occupancy. We  
607 can, however, state that at individual known transcriptional enhancers with >70 factors,  
608 the ChIP signal for identified anchor factors was significantly higher in magnitude.

609 The results thus far argue that a fully comprehensive catalog of all DAPs will help us to  
610 parse among these possibilities, which are not mutually exclusive. Completeness  
611 should also contribute to identification of additional novel motifs, and, in the cases of  
612 indirect motifs found for factors with known direct motifs, allow for more accurate motif-  
613 calling. Additionally, a complete catalog of factors in a single cell type will support  
614 imputation of critical contacts in DAP networks for three dimensional assembly of  
615 genomic enhancer-promoter organization not possible from a few individual DAP  
616 binding maps, as demonstrated by our findings regarding the NuRD complex.

617 We anticipate the continued addition of data from more DAPs, and aim to achieve factor  
618 completeness in at least one cell line, and hopefully more. We are very interested in  
619 learning which of the patterns we observe are specific to HepG2, and which will be  
620 recapitulated in other cell lines and, importantly, in primary cells or tissues. The  
621 ENCODE Project also continues to expand cellular contexts for these assays. We  
622 anticipate more large-scale analyses such as this, and hope that the perspectives  
623 gained from these inform more targeted research endeavors and generate meaningful  
624 hypotheses.

625

## 626 **Methods**

### 627 **Data access:**

628 Data sets generated from this study are available at the ENCODE portal and at Gene  
629 Expression Omnibus (<https://www.ncbi.nlm.nih.gov/geo/>) under accession number  
630 GSE104247

### 631 **ChIP-seq/CETCh-seq:**

632 All protocols for ChIP-seq and CETCh-seq are previously published and available at the  
633 ENCODE web portal ([www.encodeproject.org/documents](http://www.encodeproject.org/documents)) [17,52]. Briefly, pools of cells  
634 were grown separately to represent replicate experiments. Crosslinking of cells was  
635 performed with 1% formaldehyde for 10 minutes at room temperature and the chromatin  
636 was sheared using a Bioruptor® Twin instrument (Diagenode). Antibody  
637 Characterization Standards are published on the ENCODE web portal and consist of a  
638 primary validation (western blot or IP-western blot) and a secondary validation (IP  
639 followed by mass spectrometry) for traditional antibody ChIP-seq. With CETCh-seq  
640 experiments, a molecular validation (PCR or Sanger sequencing confirmation of edited  
641 genes) in addition to one of the immunological validations (western blot, IP-western blot,  
642 or IP-mass spectrometry) is required for release. Raw fastq data were downloaded from  
643 the publicly available ENCODE Data Coordination Center, and aligned to human  
644 reference genome (hg19) using BWA-0.7.12 (Burrows Wheeler Aligner) alignment  
645 algorithm [88]. Post alignment filtering steps were carried out by samtools-1.3 [89] with  
646 MAPQ threshold of 30, and duplicate removal was performed using picard-tools-1.88 [  
647 <http://picard.sourceforge.net> ]. Followed by filtering, each TF's genome-wide binding  
648 sites (peak enrichment) were computed using phantompeakqualtools, implementing  
649 SPP algorithm [43,46], with replicate consistency and peak ranking determined by  
650 Irreproducible Discovery Rate (IDR) using the IDR-2.0.2 tool [56] to generate  
651 narrowpeaks passing IDR cutoff 0.02 (soft-idr-threshold). ENCODE blacklisted regions  
652 (wgEncodeDacMapabilityConsensusExcludable.bed.gz, downloadable from UCSC  
653 genome browser <https://genome.ucsc.edu/>) were filtered out. Additionally, we note that  
654 plasmids used to generate edited cells with epitope-tagged TFs are deposited to

655 Addgene, the non-profit plasmid repository, and are available for researchers to tag  
656 these factors in other cell lines of interest. We also note that GC content of DNA has  
657 been reported as a source of bias in ChIP-seq data, leading to over-representation of  
658 TFBSs and false positive peak calls, which could confound subsequent analyses  
659 [90,91]. To address this concern, we have performed ChIP-seq experiments in unedited  
660 cell lines using the FLAG antibody (Sigma F1804) utilized in CETCh-seq, and used  
661 these libraries as background for peak-calling. In these experiments, the only variable is  
662 the edited cell line used as foreground, and most biases should be accounted for.

### 663 **De novo sequence motif analysis:**

664 To identify enriched sequence motifs in the binding sites of sequence-specific factors,  
665 de novo sequence motif and motif enrichment analysis was performed using MEME-  
666 ChIP [56] suite and pipeline was built as previously described [57], on 500 bp regions  
667 centered on peak summits based on hg19 reference genome fasta. Top 5 motifs per  
668 dataset were reported from top 500 peaks based on signal value, using 2X random/null  
669 sequence with matched size, GC content and repeat fraction as a background. Central  
670 motif enrichment analysis was performed using Centrimo [21], to infer most centrally  
671 enriched motifs with de novo motifs generated from the pipeline against the 2X null  
672 sequence background.

### 673 **Comparative motif analysis:**

674 De novo motifs generated from DNA binding factors were filtered for high confidence  
675 motifs, including only highly significant and strongly enriched in binding sites, based on  
676 MEME E-value < 1e-05, Centrimo E-value < 1e-10 and Centrimo binwidth < 150. High  
677 confidence motifs were then compared, and quantified for similarity against the  
678 previously derived or known motifs available in the CIS-BP build 1.02 and JASPAR  
679 2016/2018 databases [4,59,60] using TOMTOM quantification tool [58]. TOMTOM E-  
680 values < 0.05 represent highly similar motifs, and > 0.05 represent the motifs with  
681 increasing magnitude of dissimilarity, or more distantly related motifs.

### 682 **Gene expression:**

683 RNA-Seq quantification data (TPM, transcripts per million) for 56 cell lines and 37  
684 tissues were retrieved from Human Protein Atlas (version 17, downloadable from  
685 <https://www.proteinatlas.org/>) [92], and used to identify 57 genes highly and specifically  
686 expressed in liver as compared to all other cell and tissue types, and also found in  
687 HepG2 with at least 10 TPM. On average, these 57 liver specific genes were 151.21  
688 times expressed than any other cell types.

### 689 **IDEAS segmentation:**

690 IDEAS segmentation for six cell-types -- HepG2, GM12878, H1hESC, HUVEC,  
691 HeLaS3, and K562 – were collected from the Penn State Genome Browser  
692 (<http://main.genome-browser.bx.psu.edu/>). All promoter-like and enhancer-like regions  
693 identified in at least one of five other cell lines, were merged using pybedtools [93,94]  
694 and these regions were filtered from the HepG2 segmentation. Significant enrichment of  
695 TF's in the cis-regulatory regions was evaluated using Fisher's exact test (pval  
696 adjusted<0.001, BH FDR corrected) against random or null sequence with matched  
697 length, GC content and repeat fraction using null sequence python script from Kmer-  
698 SVM [95]. Heatmaps were generated using heatmap.2 function from R gplots package  
699 [<https://cran.r-project.org/web/packages/gplots/>].

### 700 **GREAT analysis:**

701 Cis-regulatory associated highly TF bound sites were binned into promoter-associated  
702 and enhancer-associated sites using IDEAS segmentation. To assess the biological  
703 function and relevance of these highly TF occupied sites, GREAT (Genomic Regions  
704 Enrichment of Annotations Tool) [68] analysis was performed to predict the function of  
705 TF bound cis-regulatory regions (<http://bejerano.stanford.edu/great/public/html/>)  
706 associating the genomic regions to genes from various ontologies such as GO  
707 molecular function, MSigDB and BioCyc pathway. The parameters used for GREAT  
708 analysis were Basal+extension (constitutive 5.0 kb upstream and 1.0 kb downstream,  
709 up to 50.0 kb max extension) for all enhancer-associated sites, and Basal+extension  
710 (constitutive 5.0 kb upstream and 1.0 kb downstream, up to 5.0 kb max extension) for

711 all promoter-associated regions with whole genome background. MSigDB pathway  
712 [96,97] was noted for genomic region enrichment analysis.

### 713 **GERP analysis:**

714 GERP (Genomic Evolutionary Rate Profiling) was performed to assess if highly TF  
715 bound cis-regulatory sites, categorized into promoter and enhancer-associated,  
716 correlates with increased evolutionary constraints. Highly constrained elements bed file  
717 containing high confidence regions (significant p-value) generated from per  
718 base GERP scores was retrieved from Sidow lab  
719 (<http://mendel.stanford.edu/SidowLab/downloads/gerp/>). Fraction of overlapping bases  
720 for each bins of “TF bound category” (low to high) with highly constrained elements was  
721 computed using bedtools-2.26.0 [94] and pandas-0.20.3, python2.7, further normalized  
722 by the fraction of “highly constrained elements” overlapping per 100 bp sized-region of  
723 TF bound categories. Additionally, Kolmogorov-Smirnov (KS) test was performed to  
724 evaluate statistically significant differences in distribution between the highly bound (20+  
725 TF bound) and lowly bound regions (1-19 TF bound sites) for both promoter- and  
726 enhancer-associated sites.

### 727 **Co-binding analysis:**

728 Pairwise overlap of binding sites between each of the 208 TFs was performed with 50  
729 bp up and downstream from the summit of peaks using python based pybedtools  
730 [93,94]. All other computations, and the pairwise peak overlap percentage for each TF  
731 to build the pairwise matrix, were performed using pandas-0.20.3, python2.7 [Python  
732 Software Foundation] to construct network plots, using R igraph, implementing  
733 Fruchterman Reingold algorithm. The interconnection between TF shared binding sites  
734 for 208 TFs was built with a minimum threshold of 75% or more overlap between any 2  
735 factors. The sizes of vertices and nodes in the graph are representative of the number  
736 of connections each TF has with its connected partner, while edges represent the  
737 degree of overlap between TFs.

738 Co-binding was characterized by merging IDR-passing narrow peak files from 208 TFs  
739 with the “merge” function from the bedtools software package [98]. A minimum of 1 bp



740 overlap was required and resultant peaks greater than 2 kb (~1%) were filtered from  
741 downstream analysis. Hierarchical clustering, using the Euclidean distance metric and  
742 Ward clustering method, of TFs based on degree of co-binding was performed in R with  
743 the “heatmap.2” function of the gplots package.

#### 744 **LS-GKM SVM analysis:**

745 At peak level, LS-GKM support vector machines (SVMs) [99] were trained on a random  
746 sample of up to 5,000 narrow peaks (using all peaks for those with fewer) as a positive  
747 set against 10X random/null sequence with matched size, GC-content and repeat  
748 fraction as a negative set. At motif level, LS-GKM support vector machines (SVMs) [99]  
749 were trained on a sample of 5,000 random motif sites found by FIMO (MEME-suite),  
750 extending +/- 15 bp, for all DNA binding factors (n=171), as a positive set against the  
751 10X random-null sequence with GC content and repeat fraction matched sequence as a  
752 negative set.

753 Null genomic sequences matched to observed binding events were obtained using the  
754 “nullseq\_generate.py” function available with the LS-GKM package. The fold number of  
755 sequences (-x) was set to ten and the random seed (-r) was set to 1. SVMs were  
756 trained using the “gkmtrain” function with a kmer length (-l) of 11, kernel function (-t) of  
757 4, regularization parameter (-c) of 1, number of informative columns (-k) of 7, and  
758 maximum number of mismatches (-d) of 3. Precision-recall area under the curves (PR-  
759 AUC) were calculated by obtaining the 10-fold cross-validation results from “gkmtrain”  
760 (after setting the -x flag to 10), and inputting the results into the “pr.curve” function of  
761 the PRROC R package, resulting in mean PR-AUC of 0.66 at the peak level, and 0.74  
762 at the motif level. Classifier values for all bound sequences were obtained using the  
763 “gkmpredict” function, and HOT sites (n=5,676) were scored with each DNA associated  
764 factor to assess their putative binding affinity at HOT regions, and percentile ranked to  
765 obtain top 5 percent and bottom 75 percent k-mer compared to enhancers with 2-10  
766 associated TFs (n=5,676) and to random enhancers with any number of associated  
767 factors (0+) (n=5,676).

#### 768 **Random Forest and PCA analysis:**

769 Principal Component Analysis (PCA) was performed on a DAP binding matrix  
770 composed of the presence or absence of motif in merged peaks as a binary matrix of  
771 loci, and implementing the python based ML library scikit-learn Sklearn (0.19.0) [100].  
772 Plots for motif-based analyses were generated using the R package ggplot2 [101] and  
773 complex Heatmap [102]. Random Forest Classifier was trained on merged DAP binding  
774 matrices at both motif and peak level to predict cis-regulatory elements (promoter or  
775 enhancer, by IDEAS annotation) using the R package ranger [103], a faster  
776 implementation of random forest in R, and also tested using Sklearn 0.19.0. Median  
777 OOB (Out-of-bag) error estimate was computed for 100 instances of randomly sampled  
778 (n=1000) loci iterations, to compute the element classification and misclassification  
779 accuracy using confusion matrix.

#### 780 **IP-mass spectrometry:**

781 Whole cell lysates of FLAG-tagged or unedited HepG2 cells (~20 million) were  
782 immunoprecipitated using a primary antibody raised against FLAG or the transcription  
783 factor, respectively. The IP fraction was loaded on a 12% TGX™ gel and separated with  
784 the Mini-PROTEAN® Tetra Cell System (Bio-Rad). The whole lane was excised and  
785 sent to the University of Alabama at Birmingham Cancer Center Mass  
786 Spectrometry/Proteomics Shared Facility. The sample was analyzed on a LTQ XL  
787 Linear Ion Trap Mass Spectrometer by LC-ESI-MS/MS. Peptides were identified using  
788 SEQUEST tandem mass spectral analysis with probability based matching at  $p <$   
789 0.05. SEQUEST results were reported with ProteinProphet protXML Viewer (TPP v4.4  
790 JETSTREAM) and filtered for a minimum probability of 0.9. For ENCODE Antibody  
791 Characterization Standards, all protein hits that met these criteria were reported,  
792 including common contaminants. Fold enrichment for each protein reported was  
793 determined using a custom script based on the FC-B score calculation [104]. Following  
794 ENCODE Antibody Characterization Guidelines, the transcription factor must be in the  
795 top 20 enriched proteins identified by IP-MS, and the top transcription factor overall for  
796 release. For GATAD2A co-associated TFs, the peptides with minimum 0.9 probability  
797 were present in less quantities than those of GATAD2A.

798 **Transcription factors footprints analysis:**

799

800 To identify TF footprints for comparison to ChIP-seq binding sites, we used PIQ (Protein  
801 Interaction Quantification) [86]. ENCODE HepG2 DNase-seq raw FASTQs (paired-end  
802 36 bp) of roughly equivalent size (Accession Numbers: ENCFF002EQ-G,H,I,J,M,N,O,P)  
803 were downloaded from the ENCODE portal and processed using ENCODE DNase-seq  
804 standard pipeline (available at [https://github.com/kundajelab/atac\\_dnase\\_pipelines](https://github.com/kundajelab/atac_dnase_pipelines)) with  
805 flags: -species hg19 -nth 32 -memory 250G -dnase\_seq -auto\_detect\_adapter -nreads  
806 15000000 -ENCODE3. Processed BAM files were merged and used as input for PIQ TF  
807 footprinting using each TF's top motif PWM. Next, identified TF footprints from every TF  
808 meeting a specified PIQ Purity (positive predictive value) were intersected with all  
809 identified ChIP-seq binding sites using BEDtools to correlate the number of unique TF  
810 footprints with the number of ChIP-seq factors identified at a given ChIP-seq binding  
811 site.

812 **SOM analysis:**

813 The self-organizing map was trained with the SOMatic package [67] using the previous  
814 chromatin analysis partitioning strategy [66] with modifications as described below We  
815 calculated the RPKM of each dataset's first replicate over each of the 951,022 genomic  
816 segments to build a training matrix. We used each dataset's second replicate to build a  
817 separate scoring matrix. The training matrix was used to train 5 trial self-organizing  
818 maps with a toroid topology with size 40 by 60 units using 10 million time steps (~10  
819 epochs) and selected the best, based on fitting error using the scoring matrix, for further  
820 analysis, and segments were assigned to their closest units based on the scoring  
821 matrix.

822 To properly fit the data, SOM units with similar profiles across experiments were  
823 grouped into metaclusters using SOMatic. Briefly, metaclustering was performed using  
824 k-means clustering of the unit profiles to determine centroids for groups of units.  
825 Metaclusters were built around these centroids so that all of the units in a cluster remain  
826 connected. SOMatic's metaclustering function attempts all metacluster numbers within a

827 range given and scores them based on Akaike information criterion (AIC) [105]. The  
828 penalty term for this score is calculated using a parameter called the “dimensionality,”  
829 which is the number of independent dimensions in the data, which in this case are the  
830 individual cell subtypes. To estimate this number, we used a 60% cut on a hierarchical  
831 clustering done on the SOM unit vectors. For this work, the dimensionality was  
832 calculated to be 6. For metaclustering, all k between 50 and 250, with 64 trials, was  
833 tested and metacluster number 196 had the lowest AIC score and was chosen for  
834 further analysis.

835 To generate decision trees for these metaclusters, each of the segments in the training  
836 matrix was labeled with its final metacluster. For each metacluster, if the metacluster is  
837 of size n, n segments of other clusters were chosen randomly, and this set of positive  
838 and negative examples was split, using 80% of the examples for training and 20% for  
839 scoring. The training data was fed through an R script using the rpart and rattle  
840 packages to create, score, prune, and re-score a tree for each metacluster. This entire  
841 process was repeated for 100 trials with only the tree with the highest accuracy drawn.

## 842 **Acknowledgements**

843 Research reported in this publication was supported by the National Human Genome  
844 Research Institute of the National Institutes of Health under Award Number  
845 U54HG006998 to R.M.M. and E.M.M.. The content is solely the responsibility of the  
846 authors and does not necessarily represent the official views of the National Institutes of  
847 Health. This work was also supported by funds from The HudsonAlpha Institute for  
848 Biotechnology. We thank Rosy Nguyen, Dianna Moore, and Megan McEown for their  
849 outstanding technical efforts in this study. We thank Brian S. Roberts and Gregory M.  
850 Cooper for helpful comments, HudsonAlpha’s Genomic Services Laboratory led by Dr.  
851 Shawn Levy for the high-throughput sequencing of much of the data used in this paper,  
852 and members of the ENCODE Consortium for public deposition of data generated by  
853 other Consortium groups.

854

855

856

- 857 1 **Vaquerizas JM, Kummerfeld SK, Teichmann SA, Luscombe NM.** 2009. A census of  
858 human transcription factors: function, expression and evolution. *Nat Rev Genet* **10**:  
859 252-63.
- 860 2 **Lambert SA, Jolma A, Campitelli LF, Das PK, et al.** 2018. The Human  
861 Transcription Factors. *Cell* **172**: 650-65.
- 862 3 **Wingender E, Schoeps T, Donitz J.** 2013. TFClass: an expandable hierarchical  
863 classification of human transcription factors. *Nucleic Acids Res* **41**: D165-70.
- 864 4 **Weirauch MT, Yang A, Albu M, Cote AG, et al.** 2014. Determination and inference  
865 of eukaryotic transcription factor sequence specificity. *Cell* **158**: 1431-43.
- 866 5 **Cowper-Sal lari R, Zhang X, Wright JB, Bailey SD, et al.** 2012. Breast cancer risk-  
867 associated SNPs modulate the affinity of chromatin for FOXA1 and alter gene  
868 expression. *Nat Genet* **44**: 1191-8.
- 869 6 **Dror I, Golan T, Levy C, Rohs R, et al.** 2015. A widespread role of the motif  
870 environment in transcription factor binding across diverse protein families. *Genome*  
871 *Res* **25**: 1268-80.
- 872 7 **Vernimmen D, Bickmore WA.** 2015. The Hierarchy of Transcriptional Activation:  
873 From Enhancer to Promoter. *Trends Genet* **31**: 696-708.
- 874 8 **Yosef N, Shalek AK, Gaublotte JT, Jin H, et al.** 2013. Dynamic regulatory  
875 network controlling TH17 cell differentiation. *Nature* **496**: 461-8.
- 876 9 **Dasen JS, Tice BC, Brenner-Morton S, Jessell TM.** 2005. A Hox regulatory network  
877 establishes motor neuron pool identity and target-muscle connectivity. *Cell* **123**:  
878 477-91.
- 879 10 **Busskamp V, Lewis NE, Guye P, Ng AH, et al.** 2014. Rapid neurogenesis through  
880 transcriptional activation in human stem cells. *Mol Syst Biol* **10**: 760.
- 881 11 **Chen X, Xu H, Yuan P, Fang F, et al.** 2008. Integration of external signaling  
882 pathways with the core transcriptional network in embryonic stem cells. *Cell* **133**:  
883 1106-17.
- 884 12 **Black JB, Adler AF, Wang HG, D'Ippolito AM, et al.** 2016. Targeted Epigenetic  
885 Remodeling of Endogenous Loci by CRISPR/Cas9-Based Transcriptional Activators  
886 Directly Converts Fibroblasts to Neuronal Cells. *Cell Stem Cell* **19**: 406-14.
- 887 13 **Visel A, Blow MJ, Li Z, Zhang T, et al.** 2009. ChIP-seq accurately predicts tissue-  
888 specific activity of enhancers. *Nature* **457**: 854-8.
- 889 14 **Iwafuchi-Doi M, Zaret KS.** 2014. Pioneer transcription factors in cell  
890 reprogramming. *Genes Dev* **28**: 2679-92.
- 891 15 **Johnson DS, Mortazavi A, Myers RM, Wold B.** 2007. Genome-wide mapping of in  
892 vivo protein-DNA interactions. *Science* **316**: 1497-502.
- 893 16 **Mikkelsen TS, Ku M, Jaffe DB, Issac B, et al.** 2007. Genome-wide maps of  
894 chromatin state in pluripotent and lineage-committed cells. *Nature* **448**: 553-60.
- 895 17 **Robertson G, Hirst M, Bainbridge M, Bilenky M, et al.** 2007. Genome-wide  
896 profiles of STAT1 DNA association using chromatin immunoprecipitation and  
897 massively parallel sequencing. *Nat Methods* **4**: 651-7.

- 898 18 **Lambert SA, Albu M, Hughes TR, Najafabadi HS.** 2016. Motif comparison based on  
899 similarity of binding affinity profiles. *Bioinformatics* **32**: 3504-6.
- 900 19 **Najafabadi HS, Albu M, Hughes TR.** 2015. Identification of C2H2-ZF binding  
901 preferences from ChIP-seq data using RCADE. *Bioinformatics* **31**: 2879-81.
- 902 20 **Bailey TL, Boden M, Buske FA, Frith M, et al.** 2009. MEME SUITE: tools for motif  
903 discovery and searching. *Nucleic Acids Res* **37**: W202-8.
- 904 21 **Bailey TL, Machanick P.** 2012. Inferring direct DNA binding from ChIP-seq. *Nucleic*  
905 *Acids Res* **40**: e128.
- 906 22 **Landolin JM, Johnson DS, Trinklein ND, Aldred SF, et al.** 2010. Sequence features  
907 that drive human promoter function and tissue specificity. *Genome Res* **20**: 890-8.
- 908 23 **Whitfield TW, Wang J, Collins PJ, Partridge EC, et al.** 2012. Functional analysis of  
909 transcription factor binding sites in human promoters. *Genome Biol* **13**: R50.
- 910 24 **Hallikas O, Palin K, Sinjushina N, Rautiainen R, et al.** 2006. Genome-wide  
911 prediction of mammalian enhancers based on analysis of transcription-factor  
912 binding affinity. *Cell* **124**: 47-59.
- 913 25 **Levo M, Zalckvar E, Sharon E, Dantas Machado AC, et al.** 2015. Unraveling  
914 determinants of transcription factor binding outside the core binding site. *Genome*  
915 *Res* **25**: 1018-29.
- 916 26 **Garton M, Najafabadi HS, Schmitges FW, Radovani E, et al.** 2015. A structural  
917 approach reveals how neighbouring C2H2 zinc fingers influence DNA binding  
918 specificity. *Nucleic Acids Res* **43**: 9147-57.
- 919 27 **Hauser K, Essuman B, He Y, Coutsiias E, et al.** 2016. A human transcription factor  
920 in search mode. *Nucleic Acids Res* **44**: 63-74.
- 921 28 **Slattery M, Riley T, Liu P, Abe N, et al.** 2011. Cofactor binding evokes latent  
922 differences in DNA binding specificity between Hox proteins. *Cell* **147**: 1270-82.
- 923 29 **Siggers T, Reddy J, Barron B, Bulyk ML.** 2014. Diversification of transcription  
924 factor paralogs via noncanonical modularity in C2H2 zinc finger DNA binding. *Mol*  
925 *Cell* **55**: 640-8.
- 926 30 **Siggers T, Gordan R.** 2014. Protein-DNA binding: complexities and multi-protein  
927 codes. *Nucleic Acids Res* **42**: 2099-111.
- 928 31 **Gertz J, Savic D, Varley KE, Partridge EC, et al.** 2013. Distinct properties of cell-  
929 type-specific and shared transcription factor binding sites. *Mol Cell* **52**: 25-36.
- 930 32 **Reddy TE, Pauli F, Sprouse RO, Neff NF, et al.** 2009. Genomic determination of the  
931 glucocorticoid response reveals unexpected mechanisms of gene regulation. *Genome*  
932 *Res* **19**: 2163-71.
- 933 33 **Chen X, Yu B, Carriero N, Silva C, et al.** 2017. Mocap: large-scale inference of  
934 transcription factor binding sites from chromatin accessibility. *Nucleic Acids Res* **45**:  
935 4315-29.
- 936 34 **Garber M, Yosef N, Goren A, Raychowdhury R, et al.** 2012. A high-throughput  
937 chromatin immunoprecipitation approach reveals principles of dynamic gene  
938 regulation in mammals. *Mol Cell* **47**: 810-22.
- 939 35 **Wang J, Zhuang J, Iyer S, Lin X, et al.** 2012. Sequence features and chromatin  
940 structure around the genomic regions bound by 119 human transcription factors.  
941 *Genome Res* **22**: 1798-812.



- 942 36 **Schmitges FW, Radovani E, Najafabadi HS, Barazandeh M, et al.** 2016.  
943 Multiparameter functional diversity of human C2H2 zinc finger proteins. *Genome*  
944 *Res* **26**: 1742-52.
- 945 37 **Imbeault M, Helleboid PY, Trono D.** 2017. KRAB zinc-finger proteins contribute to  
946 the evolution of gene regulatory networks. *Nature* **543**: 550-4.
- 947 38 **Yan J, Enge M, Whittington T, Dave K, et al.** 2013. Transcription factor binding in  
948 human cells occurs in dense clusters formed around cohesin anchor sites. *Cell* **154**:  
949 801-13.
- 950 39 **Savic D, Partridge EC, Newberry KM, Smith SB, et al.** 2015. CETCh-seq: CRISPR  
951 epitope tagging ChIP-seq of DNA-binding proteins. *Genome Res* **25**: 1581-9.
- 952 40 **Partridge EC, Watkins TA, Mendenhall EM.** 2016. Every transcription factor  
953 deserves its map: Scaling up epitope tagging of proteins to bypass antibody  
954 problems. *Bioessays* **38**: 801-11.
- 955 41 **Baresic M, Salatino S, Kupr B, van Nimwegen E, et al.** 2014. Transcriptional  
956 network analysis in muscle reveals AP-1 as a partner of PGC-1alpha in the  
957 regulation of the hypoxic gene program. *Mol Cell Biol* **34**: 2996-3012.
- 958 42 **Fernandez PC, Frank SR, Wang L, Schroeder M, et al.** 2003. Genomic targets of  
959 the human c-Myc protein. *Genes Dev* **17**: 1115-29.
- 960 43 **Landt SG, Marinov GK, Kundaje A, Kheradpour P, et al.** 2012. ChIP-seq guidelines  
961 and practices of the ENCODE and modENCODE consortia. *Genome Res* **22**: 1813-31.
- 962 44 **Baranello L, Kouzine F, Sanford S, Levens D.** 2016. ChIP bias as a function of  
963 cross-linking time. *Chromosome Res* **24**: 175-81.
- 964 45 **Teytelman L, Ozaydin B, Zill O, Lefrancois P, et al.** 2009. Impact of chromatin  
965 structures on DNA processing for genomic analyses. *PLoS One* **4**: e6700.
- 966 46 **Kharchenko PV, Tolstorukov MY, Park PJ.** 2008. Design and analysis of ChIP-seq  
967 experiments for DNA-binding proteins. *Nat Biotechnol* **26**: 1351-9.
- 968 47 **Li Q, Brown JB, Huang H, Bickel PJ.** 2011. Measuring reproducibility of high-  
969 throughput experiments. *The Annals of Applied Statistics* **5**: 1752-79.
- 970 48 **Zhang Y, An L, Yue F, Hardison RC.** 2016. Jointly characterizing epigenetic  
971 dynamics across multiple human cell types. *Nucleic Acids Res* **44**: 6721-31.
- 972 49 **Kowalczyk MS, Hughes JR, Garrick D, Lynch MD, et al.** 2012. Intragenic enhancers  
973 act as alternative promoters. *Mol Cell* **45**: 447-58.
- 974 50 **Dao LTM, Galindo-Albarran AO, Castro-Mondragon JA, Andrieu-Soler C, et al.**  
975 2017. Genome-wide characterization of mammalian promoters with distal enhancer  
976 functions. *Nat Genet* **49**: 1073-81.
- 977 51 **Andersson R, Sandelin A, Danko CG.** 2015. A unified architecture of  
978 transcriptional regulatory elements. *Trends Genet* **31**: 426-33.
- 979 52 **Cirillo LA, Lin FR, Cuesta I, Friedman D, et al.** 2002. Opening of compacted  
980 chromatin by early developmental transcription factors HNF3 (FoxA) and GATA-4.  
981 *Mol Cell* **9**: 279-89.
- 982 53 **Magnani L, Eeckhoutte J, Lupien M.** 2011. Pioneer factors: directing transcriptional  
983 regulators within the chromatin environment. *Trends Genet* **27**: 465-74.
- 984 54 **Teytelman L, Thurtle DM, Rine J, van Oudenaarden A.** 2013. Highly expressed  
985 loci are vulnerable to misleading ChIP localization of multiple unrelated proteins.  
986 *Proc Natl Acad Sci U S A* **110**: 18602-7.

- 987 55 **Bailey TL, Johnson J, Grant CE, Noble WS.** 2015. The MEME Suite. *Nucleic Acids Res*  
988 **43:** W39-49.
- 989 56 **Machanick P, Bailey TL.** 2011. MEME-ChIP: motif analysis of large DNA datasets.  
990 *Bioinformatics* **27:** 1696-7.
- 991 57 **Ma W, Noble WS, Bailey TL.** 2014. Motif-based analysis of large nucleotide data  
992 sets using MEME-ChIP. *Nat Protoc* **9:** 1428-50.
- 993 58 **Gupta S, Stamatoyannopoulos JA, Bailey TL, Noble WS.** 2007. Quantifying  
994 similarity between motifs. *Genome Biol* **8:** R24.
- 995 59 **Sandelin A, Alkema W, Engstrom P, Wasserman WW, et al.** 2004. JASPAR: an  
996 open-access database for eukaryotic transcription factor binding profiles. *Nucleic*  
997 *Acids Res* **32:** D91-4.
- 998 60 **Mathelier A, Fornes O, Arenillas DJ, Chen CY, et al.** 2016. JASPAR 2016: a major  
999 expansion and update of the open-access database of transcription factor binding  
1000 profiles. *Nucleic Acids Res* **44:** D110-5.
- 1001 61 **Oliphant AR, Brandl CJ, Struhl K.** 1989. Defining the sequence specificity of DNA-  
1002 binding proteins by selecting binding sites from random-sequence oligonucleotides:  
1003 analysis of yeast GCN4 protein. *Mol Cell Biol* **9:** 2944-9.
- 1004 62 **Worsley Hunt R, Wasserman WW.** 2014. Non-targeted transcription factors motifs  
1005 are a systemic component of ChIP-seq datasets. *Genome Biol* **15:** 412.
- 1006 63 **Jolma A, Yan J, Whittington T, Toivonen J, et al.** 2013. DNA-binding specificities of  
1007 human transcription factors. *Cell* **152:** 327-39.
- 1008 64 **Morgunova E, Taipale J.** 2017. Structural perspective of cooperative transcription  
1009 factor binding. *Curr Opin Struct Biol* **47:** 1-8.
- 1010 65 **Wei B, Jolma A, Sahu B, Orre LM, et al.** 2018. A protein activity assay to measure  
1011 global transcription factor activity reveals determinants of chromatin accessibility.  
1012 *Nat Biotechnol* **36:** 521-9.
- 1013 66 **Mortazavi A, Pepke S, Jansen C, Marinov GK, et al.** 2013. Integrating and mining  
1014 the chromatin landscape of cell-type specificity using self-organizing maps. *Genome*  
1015 *Res* **23:** 2136-48.
- 1016 67 **Longabaugh WJR, Zeng W, Zhang JA, Hosokawa H, et al.** 2017. Bcl11b and  
1017 combinatorial resolution of cell fate in the T-cell gene regulatory network. *Proc Natl*  
1018 *Acad Sci U S A* **114:** 5800-7.
- 1019 68 **McLean CY, Bristor D, Hiller M, Clarke SL, et al.** 2010. GREAT improves functional  
1020 interpretation of cis-regulatory regions. *Nat Biotechnol* **28:** 495-501.
- 1021 69 **Whyte WA, Bilodeau S, Orlando DA, Hoke HA, et al.** 2012. Enhancer  
1022 decommissioning by LSD1 during embryonic stem cell differentiation. *Nature* **482:**  
1023 221-5.
- 1024 70 **Liang Z, Brown KE, Carroll T, Taylor B, et al.** 2017. A high-resolution map of  
1025 transcriptional repression. *Elife* **6.**
- 1026 71 **Zhang Y, Ng HH, Erdjument-Bromage H, Tempst P, et al.** 1999. Analysis of the  
1027 NuRD subunits reveals a histone deacetylase core complex and a connection with  
1028 DNA methylation. *Genes Dev* **13:** 1924-35.
- 1029 72 **Huttlin EL, Ting L, Bruckner RJ, Gebreab F, et al.** 2015. The BioPlex Network: A  
1030 Systematic Exploration of the Human Interactome. *Cell* **162:** 425-40.

- 1031 73 **Faherty N, Benson M, Sharma E, Lee A, et al.** 2016. Negative autoregulation of  
1032 BMP dependent transcription by SIN3B splicing reveals a role for RBM39. *Sci Rep* **6**:  
1033 28210.
- 1034 74 **Choi WI, Yoon JH, Kim MY, Koh DI, et al.** 2014. Promyelocytic leukemia zinc  
1035 finger-retinoic acid receptor alpha (PLZF-RARalpha), an oncogenic transcriptional  
1036 repressor of cyclin-dependent kinase inhibitor 1A (p21WAF/CDKN1A) and tumor  
1037 protein p53 (TP53) genes. *J Biol Chem* **289**: 18641-56.
- 1038 75 **Hnisz D, Abraham BJ, Lee TI, Lau A, et al.** 2013. Super-enhancers in the control of  
1039 cell identity and disease. *Cell* **155**: 934-47.
- 1040 76 **Gunther K, Rust M, Leers J, Boettger T, et al.** 2013. Differential roles for MBD2  
1041 and MBD3 at methylated CpG islands, active promoters and binding to exon  
1042 sequences. *Nucleic Acids Res* **41**: 3010-21.
- 1043 77 **Zaret KS, Carroll JS.** 2011. Pioneer transcription factors: establishing competence  
1044 for gene expression. *Genes Dev* **25**: 2227-41.
- 1045 78 **Lian Z, Karpikov A, Lian J, Mahajan MC, et al.** 2008. A genomic analysis of RNA  
1046 polymerase II modification and chromatin architecture related to 3' end RNA  
1047 polyadenylation. *Genome Res* **18**: 1224-37.
- 1048 79 **Conacci-Sorrell M, McFerrin L, Eisenman RN.** 2014. An overview of MYC and its  
1049 interactome. *Cold Spring Harb Perspect Med* **4**: a014357.
- 1050 80 **Hervouet E, Vallette FM, Cartron PF.** 2009. Dnmt3/transcription factor  
1051 interactions as crucial players in targeted DNA methylation. *Epigenetics* **4**: 487-99.
- 1052 81 **Boyle AP, Araya CL, Brdlik C, Cayting P, et al.** 2014. Comparative analysis of  
1053 regulatory information and circuits across distant species. *Nature* **512**: 453-6.
- 1054 82 **Gerstein MB, Lu ZJ, Van Nostrand EL, Cheng C, et al.** 2010. Integrative analysis of  
1055 the *Caenorhabditis elegans* genome by the modENCODE project. *Science* **330**: 1775-  
1056 87.
- 1057 83 **Moorman C, Sun LV, Wang J, de Wit E, et al.** 2006. Hotspots of transcription factor  
1058 colocalization in the genome of *Drosophila melanogaster*. *Proc Natl Acad Sci U S A*  
1059 **103**: 12027-32.
- 1060 84 **Wreczycka K, Franke V, Uyar B, Wurmus R, et al.** 2017. HOT or not: Examining  
1061 the basis of high-occupancy target regions. *bioRxiv doi: 101101/107680*.
- 1062 85 **Shin H, Liu T, Duan X, Zhang Y, et al.** 2013. Computational methodology for ChIP-  
1063 seq analysis. *Quant Biol* **1**: 54-70.
- 1064 86 **Sherwood RI, Hashimoto T, O'Donnell CW, Lewis S, et al.** 2014. Discovery of  
1065 directional and nondirectional pioneer transcription factors by modeling DNase  
1066 profile magnitude and shape. *Nat Biotechnol* **32**: 171-8.
- 1067 87 **Panne D, Maniatis T, Harrison SC.** 2007. An atomic model of the interferon-beta  
1068 enhanceosome. *Cell* **129**: 1111-23.
- 1069 88 **Li H, Durbin R.** 2009. Fast and accurate short read alignment with Burrows-  
1070 Wheeler transform. *Bioinformatics* **25**: 1754-60.
- 1071 89 **Li H, Handsaker B, Wysoker A, Fennell T, et al.** 2009. The Sequence  
1072 Alignment/Map format and SAMtools. *Bioinformatics* **25**: 2078-9.
- 1073 90 **Worsley Hunt R, Mathelier A, Del Peso L, Wasserman WW.** 2014. Improving  
1074 analysis of transcription factor binding sites within ChIP-Seq data based on  
1075 topological motif enrichment. *BMC Genomics* **15**: 472.

- 1076 91 **Teng M, Irizarry RA.** 2017. Accounting for GC-content bias reduces systematic  
1077 errors and batch effects in ChIP-seq data. *Genome Res* **27**: 1930-8.
- 1078 92 **Uhlen M, Fagerberg L, Hallstrom BM, Lindskog C, et al.** 2015. Proteomics. Tissue-  
1079 based map of the human proteome. *Science* **347**: 1260419.
- 1080 93 **Dale RK, Pedersen BS, Quinlan AR.** 2011. Pybedtools: a flexible Python library for  
1081 manipulating genomic datasets and annotations. *Bioinformatics* **27**: 3423-4.
- 1082 94 **Quinlan AR, Hall IM.** 2010. BEDTools: a flexible suite of utilities for comparing  
1083 genomic features. *Bioinformatics* **26**: 841-2.
- 1084 95 **Fletez-Brant C, Lee D, McCallion AS, Beer MA.** 2013. kmer-SVM: a web server for  
1085 identifying predictive regulatory sequence features in genomic data sets. *Nucleic*  
1086 *Acids Res* **41**: W544-56.
- 1087 96 **Liberzon A, Birger C, Thorvaldsdottir H, Ghandi M, et al.** 2015. The Molecular  
1088 Signatures Database (MSigDB) hallmark gene set collection. *Cell Syst* **1**: 417-25.
- 1089 97 **Subramanian A, Tamayo P, Mootha VK, Mukherjee S, et al.** 2005. Gene set  
1090 enrichment analysis: a knowledge-based approach for interpreting genome-wide  
1091 expression profiles. *Proc Natl Acad Sci U S A* **102**: 15545-50.
- 1092 98 **Quinlan AR.** 2014. BEDTools: The Swiss-Army Tool for Genome Feature Analysis.  
1093 *Curr Protoc Bioinformatics* **47**: 11 2 1-34.
- 1094 99 **Ghandi M, Mohammad-Noori M, Ghareghani N, Lee D, et al.** 2016. gkmSVM: an R  
1095 package for gapped-kmer SVM. *Bioinformatics* **32**: 2205-7.
- 1096 100 **Pedregosa ea.** 2011. Scikit-learn: Machine Learning in Python. *JMLR* **12**: 2825-30.
- 1097 101 **Wickham H.** 2016. ggplot2: Elegant Graphics for Data Analysis. *Springer-Verlag,*  
1098 *New York.*
- 1099 102 **Gu Z, Eils R, Schlesner M.** 2016. Complex heatmaps reveal patterns and  
1100 correlations in multidimensional genomic data. *Bioinformatics* **32**: 2847-9.
- 1101 103 **Wright MN, Ziegler, A.** 2017. ranger: A fast implementation of random forests for  
1102 high dimensional data in C++ and R. *Journal of Statistical Software* **77**: 1-17.
- 1103 104 **Mellacheruvu D, Wright Z, Couzens AL, Lambert JP, et al.** 2013. The CRAPome: a  
1104 contaminant repository for affinity purification-mass spectrometry data. *Nat*  
1105 *Methods* **10**: 730-6.
- 1106 105 **Akaike H.** 1973. Information theory and an extension of the maximum likelihood  
1107 principle. *International Symposium on Information Theory*: 267-81.

1108
